1 Genetic population structure constrains local adaptation in  
2 sticklebacks

3

4 Petri Kemppainen<sup>1,\*</sup>, Zitong Li<sup>1,2</sup>, Pasi Rastas<sup>1,3</sup>, Ari Löytynoja<sup>3</sup>, Bohao Fang<sup>1</sup>, Jing  
5 Yang<sup>1,4</sup>, Baocheng Guo<sup>5</sup>, Takahito Shikano<sup>1</sup>, Juha Merilä<sup>1</sup>

6 <sup>1</sup>Ecological Genetics Research Unit, Organismal and Evolutionary Biology Research  
7 Programme, Faculty of Biological and Environmental Sciences, FI-00014 University of  
8 Helsinki, Finland

9 <sup>2</sup>CSIRO Agriculture & Food, GPO Box 1600, Canberra, ACT 2601, Australia;

10 <sup>3</sup>Institute of Biotechnology, FI-00014 University of Helsinki, Finland

11 <sup>4</sup>Chinese Sturgeon Research Institute, Three Gorges Corporation, Yichang, 443100,  
12 China

13 <sup>5</sup>The Key Laboratory of Zoological Systematics and Evolution, Institute of Zoology,  
14 Chinese Academy of Sciences, Beijing, China

15 \*Corresponding author: [petrikemppainen2@gmail.com](mailto:petrikemppainen2@gmail.com)

16

17

18 **Abstract**

19 Repeated and independent adaptation to specific environmental conditions from standing  
20 genetic variation is common. However, if genetic variation is limited, the evolution of  
21 similar locally adapted traits may be restricted to genetically different and potentially less  
22 optimal solutions, or prevented from happening altogether. Using a quantitative trait  
23 locus (QTL) mapping approach, we identified the genomic regions responsible for the  
24 repeated pelvic reduction (PR) in three crosses between nine-spined stickleback  
25 populations expressing full and reduced pelvic structures. In one cross, PR mapped to  
26 linkage group 7 (LG7) containing the gene *Pitx1*, known to control pelvic reduction also  
27 in the three-spined stickleback. In the two other crosses, PR was polygenic and attributed  
28 to ten novel QTL, of which 90% were unique to specific crosses. When screening the  
29 genomes from 27 different populations for deletions in the *Pitx1* regulatory element,  
30 these were only found in the population in which PR mapped to LG7, even though the  
31 morphological data indicated large effect QTL for PR in several other populations as  
32 well. Consistent with the available theory and simulations parameterised on empirical  
33 data, we hypothesise that the observed variability in genetic architecture of PR is due to  
34 heterogeneity in the spatial distribution of standing genetic variation caused by strong  
35 population structuring and genetic isolation by distance in the sea.

36  
37 **Keywords:** convergent evolution, epistasis, local adaptation, pelvic reduction, *Pitx1*,

38 *Pungitius pungitius*

## 39 **Introduction**

40 Failure to evolve in response to changing environmental conditions may lead to  
41 extirpation or even extinction (Orr and Unckless 2008). If heritable variation necessary  
42 for adapting to environmental change already exists in the form of standing genetic  
43 variation, genetic adaptation may proceed swiftly, at least compared to the time it would  
44 take for populations to adapt from novel mutations (Orr and Unckless 2008; Barrett and  
45 Schluter 2008; Thompson *et al.* 2019). Furthermore, when exposed to novel yet similar  
46 environments, populations derived from the same ancestral population – hence carrying  
47 the same pool of alleles – can often be expected to respond to similar selection pressures  
48 in a similar fashion, leading to parallel phenotypic evolution (Arendt and Reznick 2007;  
49 Schluter and Conte 2009; Elmer and Meyer 2011; Stern 2013; Conte *et al.* 2015; Bolnick  
50 *et al.* 2018; Hermisson and Pennings 2017). However, in genetically highly structured  
51 species, potentially advantageous rare alleles may be lost due to founder events and  
52 random genetic drift, thus preventing adaptation. Alternatively, due to heterogeneity in  
53 the distribution of standing genetic variation, adaptation to given selection pressures  
54 could more likely be acquired with phylogenetically independent alleles (rather than  
55 alleles that are identical by descent) at the same or different loci influencing the same  
56 trait, even if they may differ significantly in their fitness effects (Cohan 1984; Merilä  
57 2013, 2014; Rosenblum *et al.* 2014). Thus, the demographic history of populations likely  
58 plays a central role in determining the likelihood of local adaptation, and hence also  
59 parallel phenotypic evolution.

60 The three-spined stickleback (*Gasterosteus aculeatus*) is a widely used model

61 system to study adaptive evolution in the wild (Bell and Foster 1994; Gibson 2005). Its  
62 ability to rapidly adapt to local environmental conditions has often been shown to stem  
63 from a global pool of ancestral standing genetic variation (Schluter and Conte 2009;  
64 Jones *et al.* 2012; Terekhanova *et al.* 2014, 2019). The nine-spined stickleback (*Pungitius*  
65 *pungitius*) has been emerging as another model system for the study of repeated evolution  
66 in the wild (Merilä 2013). In general, it differs from the three-spined stickleback by  
67 having smaller effective population sizes ( $N_e$ ), reduced gene flow in the sea, and a  
68 tendency to occur in small landlocked ponds in complete isolation from other populations  
69 (Shikano *et al.* 2010a; DeFaveri *et al.* 2012; Merilä 2013; this study). Given their  
70 contrasting population demographic characteristics, three- and nine-spined sticklebacks  
71 can thus be expected to respond differently with respect to local adaption to newly  
72 colonised freshwater habitats.

73         Regressive evolution of the pelvic complex has occurred in freshwater  
74 populations of three (*viz.*, *Gasterosteus*, *Pungitius*, and *Culaea*) of the five recognised  
75 stickleback genera since the last glacial period (reviewed in Klepaker *et al.* 2013). While  
76 marine populations of three- and nine-spined sticklebacks usually have complete pelvic  
77 structures with fully developed pelvic girdles and lateral pelvic spines, partial or even  
78 complete pelvic reduction is common in freshwater populations (Blouw and Boyd 1992;  
79 Shapiro *et al.* 2004, 2006; Herczeg *et al.* 2010; Klepaker *et al.* 2013). Several factors may  
80 contribute to this, including the absence of gape-limited predatory fish and limited  
81 calcium availability, as well as the presence of certain insect predators (Reist *et al.* 1980;  
82 Reimchen *et al.* 1983; Giles 1983; Bell *et al.* 1993; Karhunen *et al.* 2013; Chan *et al.*

83 2010) in freshwater environments. Collectively, sticklebacks provide an important model  
84 system to study the genetic mechanisms underlying the adaptive parallel pelvic reduction  
85 at both intra- and inter-specific levels, under a wide range of population demographic  
86 settings. However, studies of parallel patterns of marine-freshwater divergence in nine-  
87 spined sticklebacks are still scarce (Herczeg *et al.* 2010; Shikano *et al.* 2010b; Wang *et*  
88 *al.* 2020), especially at the genetic level, precluding any comprehensive and conclusive  
89 comparison of the two species.

90 The genetic basis of pelvic reduction in the three-spined stickleback is well  
91 understood. Quantitative trait locus (QTL) mapping studies have identified a single  
92 chromosomal region containing the gene *Pituitary homeobox transcription factor 1*  
93 (*Pitx1*) that explains more than two thirds of the variance in pelvic size in crosses  
94 between individuals with complete pelvic girdles and spines, and pelvic-reduced  
95 individuals (Cresko *et al.* 2004; Shapiro *et al.* 2004; Coyle *et al.* 2007). Pelvic loss in the  
96 marine-freshwater three-spined stickleback model system is predominantly caused by  
97 expression changes of the *Pitx1* gene due to recurrent deletions of the pelvic enhancer  
98 (*Pel*) upstream of *Pitx1* (Chan *et al.* 2010; Xie *et al.* 2019; in benthic-limnetic and lake-  
99 stream pairs of three-spined sticklebacks, the genetic architecture of pelvic reduction is  
100 more diversified; Peichel *et al.* 2001, 2017; Deagle *et al.* 2012; Stuart *et al.* 2017). While  
101 pelvic reduction in freshwater is much less common in nine- than three-spined  
102 stickleback (Klepaker *et al.* 2013; Fig. 1), two independent QTL studies also identified  
103 *Pitx1* in linkage group (LG) 7 as a major cause for pelvic reduction in a Canadian  
104 (Shapiro *et al.* 2006) and a Finnish (Shikano *et al.* 2013) population. Another large effect

105 region in LG4 was found to be associated with pelvic reduction in an Alaskan population  
106 (Shapiro *et al.* 2009). Similar to the three-spined stickleback, pelvic spine and pelvic  
107 girdle sizes are strongly correlated in the population from the Finnish pond Ryttilampi,  
108 since *Pitx1* controls both phenotypes (Shikano *et al.* 2013; Fig. 1 and Supplementary  
109 Table 1). In contrast, a considerable amount of phenotypic variation with respect to these  
110 traits and their inter-correlations exists among different freshwater pond populations in  
111 northern Europe (Herczeg *et al.* 2010; Karhunen *et al.* 2013, 2014; Fig. 1). Given their  
112 high heritability (Blouw and Boyd 1992; Leinonen *et al.* 2011), the lack of correlation  
113 between spine and girdle lengths suggests that they can be independently controlled by  
114 different QTL. Thus, the genetic underpinnings of pelvic reduction in nine-spined  
115 sticklebacks (when it occurs) appear to be more diversified than those in the marine-  
116 freshwater three-spined stickleback model system (Merilä 2013, 2014).

117 Starting with a survey of previously published phenotypic data on pelvic  
118 reduction in the wild, we aimed to investigate the possible genetic heterogeneity  
119 underlying pelvic reduction in different nine-spined stickleback populations by mapping  
120 QTL for pelvic reduction in three independently colonised ponds. One was the previously  
121 studied Ryttilampi (earlier analysed only with microsatellites, Shikano *et al.* 2013), now  
122 re-analysed along with two new populations (Bynästjärnen and Pyöreälampi) using >75  
123 000 SNPs. This data was subjected to a cutting-edge mapping approach (Li Z. *et al.* 2017,  
124 2018) that can provide more information on the source of the QTL effects than has been  
125 previously possible. To further assess the extent to which *Pel* could be responsible for  
126 pelvic reduction in the nine-spined stickleback, we screened the whole genomes of

127 individuals from 27 wild populations for deletions in the genomic region spanning the *Pel*  
128 element and the *Pitx1* gene. Finally, utilising more comprehensive geographic sampling  
129 than in previous studies (Shikano *et al.* 2010a; DeFaveri *et al.* 2012; Merilä 2013), along  
130 with high-quality SNP data, we re-assessed the differences in population structuring and  
131 genetic isolation by distance (IBD) between nine- and three-spined sticklebacks. We  
132 hypothesised that, in contrast to three-spined sticklebacks, both the scarcity and  
133 variability in the genetic architecture of pelvic reduction in nine-spined sticklebacks is  
134 due to heterogeneity in the spatial patterns of standing genetic variation caused by strong  
135 population structuring – both among adjacent pond populations as well as in the ancestral  
136 sea population(s). Building on previous theoretical work, this hypothesis was tested using  
137 simulated data parameterised on population demographic parameters obtained from  
138 empirical data.

139

## 140 **Materials and Methods**

### 141 *Fish collection, crossing, and rearing*

142 For the QTL crosses, three different marine F<sub>0</sub> generation females from the Baltic Sea  
143 (Helsinki, Finland; 60°13'N, 25°11'E) were crossed with a freshwater F<sub>0</sub> generation male  
144 from either Bynästjärnen (64°27'N, 19°26'E), Pyöreälampi (66°15'N, 29°26'E) or  
145 Rytilampi (66°23'N, 29°19'E) ponds. Fish crossing, rearing, and sampling followed the  
146 experimental protocol used in the earlier study of the Rytilampi population (Shikano *et*  
147 *al.* 2013; Laine *et al.* 2013). For Rytilampi, the F<sub>0</sub> generation fish were artificially mated  
148 in the lab during the early breeding season of 2006 (Shikano *et al.* 2013), and the

149 resulting full-sib F<sub>1</sub>-offspring were group-reared in aquaria until mature, as explained in  
150 Shikano *et al.* (2013). Two randomly chosen F<sub>1</sub> individuals were mated repeatedly (seven  
151 different clutches) to produce the F<sub>2</sub> generation between September and October 2008.  
152 The offspring were reared in separate aquaria. The same procedure was followed for  
153 Pyöreälampi (F<sub>0</sub> mating: Jun 2011; F<sub>1</sub> mating: Jul–Sep 2012; F<sub>2</sub> rearing: Jul 2012–Apr  
154 2013; 8 different clutches) and Bynästjärnen (F<sub>0</sub> mating: Jun 2011; F<sub>1</sub> mating: Nov 2013–  
155 Jan 2014, F<sub>2</sub> rearing: Nov 2013–Aug 2014; 6 different clutches). The F<sub>2</sub> fish were  
156 euthanized at 187, 238, and 238 days post-hatch for Rytilampi, Pyöreälampi and  
157 Bynästjärnen, respectively. At this point, the fish were on average 52.3 mm in standard  
158 length (Rytilampi = 48.6 mm; Pyöreälampi = 52.3 mm; Bynästjärnen = 53.6 mm), and  
159 weighed on average 1.34 g (wet weight; Rytilampi = 1.07 g; Pyöreälampi = 1.49 g;  
160 Bynästjärnen = 1.44 g). In total, 308, 283 and 279 F<sub>2</sub> offspring were available for  
161 analyses from Helsinki × Bynästjärnen (HEL × BYN), Helsinki × Pyöreälampi (HEL ×  
162 PYÖ) and Helsinki × Rytilampi (HEL × RYT) crosses, respectively.

163         The experiments were conducted under licenses from the Finnish National  
164 Animal Experiment Board (#STH379A and #STH223A). Experimental protocols were  
165 approved by the ethics committee of the University of Helsinki, and all experiments were  
166 performed in accordance with relevant guidelines and regulations.

167

#### 168 *Morphological data*

169 To visualise bony elements, all of the F<sub>2</sub>-progeny were stained with Alizarin Red S  
170 following Pritchard and Schluter (2001). Pelvic spine and girdle lengths from both sides



171 of the body, as well as standard body length, were measured with digital calipers to the  
172 nearest 0.01 mm. Although it is known that the left-right asymmetry of the pelvic girdle  
173 is heritable in sticklebacks (Blouw and Boyd 1992; Bell *et al.* 2007; Coyle *et al.* 2007),  
174 we did not specifically study this. To reduce the number of tests, the mean of the left and  
175 right-side measurements was used (analyses conducted for the two sides separately  
176 always yielded qualitatively similar results as the tests conducted with the averages;  
177 results not shown). All measurements were made by the same person twice; the  
178 repeatability (R; Becker 1984) ranged between 0.80 and 0.84 for girdle lengths, and  
179 between 0.98 and 0.99 for spine lengths. The QTL analyses were performed on both  
180 absolute and relative (scaled to the total body length) trait values, but for all of the  
181 analyses that compared phenotypic data between populations (which also differ in body  
182 sizes), only relative trait values were used. Previously published phenotypic data from 19  
183 wild populations were obtained from Herczeg *et al.* (2010) and Karhunen *et al.* (2013).  
184 These included data on pelvic spine and girdle lengths of wild-collected individuals from  
185 ten pond populations (Abbortjärn = ABB, Bolotjone = BOL, Karilampi = KAR,  
186 Kirkasvetinen lampi = KRK, Mashinnoje = MAS, Lil-Navartjärn = NAV, Hansmytjärn =  
187 HAN, Ryttilampi = RYT, Bynästjärnen = BYN), four lake populations (Iso Porontima =  
188 POR, Riikojärvi = RII, Joortiljärvi = JOR, Västre-Skavträsket = SKA) and five marine  
189 populations (Fiskebäckskil = FIS, Trelleborg = TRE, Bölesviken = BÖL, Helsinki = HEL  
190 LEV = Levin Navolak), as well data on common garden-reared F<sub>1</sub> generation individuals  
191 from two marine (HEL and LEV) and two pond (BYN and PYÖ) populations. Visibly  
192 broken spines were treated as missing data. A map showing the geographic location of

193 these populations is provided in Supplementary Fig. 1.

194

195 *Genotyping and linkage map construction*

196 The RAD sequencing protocol used to obtain the SNP data was the same as in Yang *et al.*

197 (2016) and Li Z. *et al.* (2017). In short, genomic DNA was extracted from ethanol

198 preserved fin clips using the phenol-chloroform method (Taggart *et al.* 1992). DNA was

199 fragmented with PstI restriction enzyme and the resulting 300–500 bp long fragments

200 were gel purified. Illumina sequencing adaptors and library specific barcodes were

201 ligated to the digested DNA fragments, and the barcoded RAD samples were pooled and

202 sequenced on 24 lanes of the Illumina HiSeq2000 platform with 45 bp single-end

203 strategy. RAD library construction and sequencing were conducted by BGI

204 HONGKONG CO., LIMITED. After eliminating adapters and barcodes from reads, a

205 quality check was done using FastQC

206 (<http://www.bioinformatics.bbsrc.ac.uk/projects/fastqc/>).

207 Linkage mapping for the three crosses was conducted using Lep-MAP3 (LM3;

208 Rastas 2017), as described in detail in Li H. *et al.* (2018). LM3 can infer the

209 parental/grandparental phase based on dense SNP data, which allowed us to utilise the

210 four-way cross QTL mapping method described below. Input data were generated by first

211 mapping individual fastq files to the nine-spined stickleback reference genome using

212 BWA mem (Li H. 2013) and SAMtools (mpileup; Li H. *et al.* 2009), followed by

213 pileupParser.awk and pileup2posterior.awk scripts from the LM3 pipeline using default

214 parameters (see Supplementary File 2 for details).

215

216 *Dimensionality reduction by linkage disequilibrium network clustering*

217 It is essential in QTL mapping to correct for multiple testing in order to reduce the rate of  
218 false positives. Moreover, in large genomic datasets, physically adjacent SNPs –

219 particularly those from experimental crosses – are often in linkage disequilibrium (LD),

220 i.e. correlated. Since a group of SNPs in high LD explains similar amounts of genetic

221 variation in a given trait, it is reasonable to apply a dimensional reduction procedure

222 before QTL-mapping to exclude the redundant information from the data. Here we used

223 linkage disequilibrium (LD) network clustering (LDn-clustering) and PC regression as

224 dimensionality reduction tools prior to single-locus QTL mapping (Li Z. *et al.* 2018). The

225 first step of this approach involves an extension of a method developed by Kemppainen

226 *et al.* (2015), which uses LD network analysis for grouping loci connected by high LD.

227 The second step involves principal component analysis (PCA) as a method for

228 dimensionality reduction in each cluster of loci connected by high LD (LD-clusters). This

229 was achieved by the function LDnClustering in the R-package LDna (v.0.64; Li Z. *et al.*

230 2018). The method used here differs slightly from the original method described in Li Z.

231 *et al.* (2018) to increase efficiency in computational speed and reduce complexity (see

232 Supplementary File 3 for details).

233

234 *QTL mapping: four-way crosses model*

235 In some circumstances, such as a four-way cross (Xu 1996), F<sub>1</sub> hybrids of two

236 heterozygous parents (Van Ooijen 2009), and an outbred F<sub>2</sub> design (Xu 2013a), it is

237 possible that up to four different alleles – A and B from the dam, and C and D from the  
238 sire – segregate in the population. In such cases, a linear regression model for QTL  
239 analysis of the outbred  $F_2$  data (Li Z. *et al.* 2018) is defined by:

$$240 \quad y_i = \beta_0 + x_{dij}\beta_{dj} + x_{sij}\beta_{sj} + z_{ij}\gamma_j + \varepsilon_i, \varepsilon_i \sim N(0, \sigma^2), (1)$$

241 where  $y_i$  is the phenotype value of individual  $i$  ( $i=1, \dots, n$ ),  $x_{dij}$ ,  $x_{sij}$ ,  $z_{ij}$  are genotypes coded  
242 as

$$243 \quad \begin{cases} +1 & +1 & +1 \\ +1 & -1 & -1 \\ -1 & +1 & -1 \\ -1 & -1 & +1 \end{cases} \begin{cases} \text{for genotype } AC, \\ \text{for } AD, \\ \text{for } BC, \\ \text{for } BD. \end{cases}, (2)$$

244 (Xu 2013b),  $\beta_0$  is the parameter of the population mean,  $\beta_{dj}$  is the substitution effect of  
245 alleles A and B of the dam (i.e. the grandfather in  $F_0$ ) at the locus  $j$  ( $j=1, \dots, p$ ;  $p$  is the  
246 total number of SNPs),  $\beta_{sj}$  is the substitution effect of alleles C and D of the sire (i.e. the  
247 grandmother in  $F_0$ ),  $\gamma_j$  is the dominance effect, and  $\varepsilon_i$  is the residual error term mutually  
248 following an independent normal distribution.

249 The model (1) requires the knowledge of the grandparental phase (produced by  
250 LM3) with the benefit that the source (*viz.*  $F_0$  female or  $F_0$  male) of the observed QTL  
251 effect can be inferred, as described in more detail in Supplementary File 1. A multiple  
252 correction on the basis of permutation tests was further conducted to control for false  
253 positives due to multiplicity (Li Z. *et al.* 2017) with  $1e^5$  replicates.

254

255 *Estimating the proportion of phenotypic variance explained by SNPs*

256 The overall proportion of phenotypic variance (PVE) explained jointly by all SNPs (an  
257 approximation of the narrow sense heritability) was obtained using LASSO regression  
258 (Tibshirani 1996), which incorporates all the SNPs into a multi-locus model:

259

$$260 \quad \frac{1}{2n} \sum_{i=1}^n (y_i - \beta_0 - x_{dij}\beta_{dj} - x_{sij}\beta_{sj} - z_{ij}\gamma_j) + \lambda \sum_{j=1}^p (|\beta_{dj}| + |\beta_{sj}| + |\gamma_j|), (3)$$

261 where the  $l_1$  penalty term  $\lambda \sum_{j=1}^p (|\beta_{dj}| + |\beta_{sj}| + |\gamma_j|)$  ( $\lambda > 0$ ) shrinks the regression  
262 parameters towards zero; all other symbols are defined in the same way as in Equation  
263 (1).

264

265 Following Sillanpää (2011), the PVE can be estimated by the formula:

266

$$267 \quad PVE_{total} = \frac{\text{var}(\sum_{j=1}^p x_j \hat{\beta}_j)}{\text{var}(y)} \approx \frac{\text{var}(y) - \sigma_0^2}{\text{var}(y)}, (4)$$

268 where  $\hat{\beta}_j$  is the effects of the SNPs, and  $\sigma_0^2$  is the LASSO residual variance estimated by a  
269 cross-validation-based estimator introduced by Reid *et al.* (2016). The PVE explained by  
270 each linkage group was estimated on the basis of the LASSO estimates using the  
271 following formula:

$$272 \quad PVE_{LG} \approx PVE_{total} - \frac{\text{var}(\sum x_j \hat{\beta}_j)}{\text{var}(y)}, (5)$$

273 where  $\hat{\beta}_j (j \notin G)$  represents all the effects estimated by the LASSO of the SNPs that do not  
274 belong to a set of SNPs (e.g. to a chromosome/linkage group). A similar approach was

275 used to estimate the contribution of grandparental alleles and to evaluate the dominance  
276 component by treating the coding systems  $[x_{dij}, x_{sij}, z_{ij}]$  (2) as different groups of SNPs. A  
277 custom R-code for PVE estimation is available from DRYAD (DOI  
278 <https://doi.org/10.5061/dryad.76hdr7str>).

279  
280 *Scanning for Pel deletions in full-genome sequence data*

281 A minimum of 20 samples from populations RYT, MAS, BOL, BYN and PYÖ, and 10–  
282 31 samples from an additional 22 populations (from Northern Europe and USA;  
283 Supplementary Fig. 1 and Supplementary Table 2) were sequenced to 10× coverage by  
284 BGI HONGKONG CO., LIMITED. Reads were mapped to the nine-spined stickleback  
285 reference genome (Varadharajan *et al.* 2019) with BWA mem (Li H. 2013), and site-wise  
286 sequencing coverages were computed with SAMtools (depth; Li H. *et al.* 2009). Relative  
287 sequence depths across the *H2afy-Pitx1* intergenic region were estimated for the five  
288 focal populations by first computing the median depths for 1000 bp sliding windows, and  
289 then normalising these by the median depth for the full intergenic region. The Pel-  
290 2.5kb<sup>SALR</sup> region was extracted from the original BAC contig (GenBank accession  
291 number GU130433.1) and mapped to the nine-spined stickleback intergenic region with  
292 minimap2 (Li H. 2018). The sequencing depths for the Pel-2.5kb<sup>SALR</sup> were normalised by  
293 dividing the mean depths of the *Pel* region by the mean depths of the full intergenic  
294 region. Gene annotations and relative sequencing depths (average and confidence  
295 intervals) were computed and visualised using the R-package Gviz (Hahne and Ivanek  
296 2016). Lastly, we scanned the literature for genes that are known to affect pelvic and hind  
297 limb development, and searched for potential matches in the nine-spined stickleback

298 genome (Varadharajan *et al.* 2019) in regions where significant QTL were found. The  
299 custom R-code for these analyses is provided in DRYAD (DOI  
300 <https://doi.org/10.5061/dryad.76hdr7str>).

301

### 302 *Simulations*

303 The repeated local adaptation in independently colonised freshwater stickleback  
304 populations is widely considered to be due to selection on standing genetic variation  
305 available in the sea, which in turn is maintained by recurrent gene flow from previously  
306 colonised freshwater populations (the “transporter hypothesis”; Schluter and Conte  
307 2009). The effects of standing genetic variation (assuming a panmictic ancestral  
308 population) on the probability of parallel local adaptation have already been studied  
309 (Ralph and Coop 2015a; MacPhearson and Nuisimer 2016; Lee and Coop 2017;  
310 Galloway and Cresko 2019), along with the effects of population structure on adaptation  
311 in continuous landscapes (Hermisson and Pennings 2005; Ralph and Coop 2010, 2015b).  
312 However, no simulations to date have explicitly considered the effects of heterogeneous  
313 patterns in the distribution of standing genetic variation on local adaptation/parallel  
314 evolution. Thus, we used forward-in-time simulations to explore the effects of the  
315 differences in population demographic parameters between nine- and three-spined  
316 sticklebacks on the probability of local adaptation, as described in Supplementary File 5.  
317 These simulations were parameterised using empirical estimates of population structure  
318 and isolation by distance in the sea for the two species (Supplementary File 4).

319           In short, two freshwater populations were connected to different marine  
320 populations at the ends of a stepping-stone chain of marine populations with the carrying  
321 capacity (K) and migration (M) both in the sea, and between the founding (marine) and  
322 founder (freshwater) population (Supplementary Fig. 3), thus generating comparable  
323 patterns of population structuring and IBD in the sea as in the empirical data (see  
324 Results). The two freshwater populations were colonised once and allowed to become  
325 locally adapted for 10,000 years. All freshwater adaptation was due to standing genetic  
326 variation in the sea that was continually replenished from a “refuge” freshwater  
327 population (situated at an equal distance from the two focal freshwater populations), as  
328 well as from the two focal freshwater populations once they were colonised. Three  
329 different genetic architectures were studied. One (architecture A) corresponds to a single  
330 large effect QTL (allowing 100% local adaptation, but with minor effect QTL also  
331 affecting the trait), another (architecture B) to a situation where at least two loci are  
332 needed to allow local adaptation (allowing 40% or 60% local adaptation), and the third  
333 (architecture C) corresponds to the same scenario as A, except that the large effect locus  
334 is recessive. Mutation rate was fixed at  $1e^{-8}$  and all loci were polymorphic at the  
335 beginning of the simulations. More details are given in Supplementary File 4.

336

## 337 **Results**

### 338 *Heterogeneity of pelvic reduction in the wild*

339 Re-analysis of previously published phenotypic data from the wild confirmed a high  
340 degree of variation among different populations with respect to pelvic spine and girdle



341 lengths and their inter-correlations (Fig. 1, Supplementary Table 1 and Supplementary  
342 Fig. 2). For instance, while spines were absent and pelvic girdles strongly reduced (but  
343 not completely absent) in RYT, spines and girdles were completely lacking in the MAS  
344 population (Fig. 1 and Supplementary Table 1). Furthermore, in the BYN population,  
345 spines were absent but pelvic girdles were only partially reduced; in BOL (a population  
346 adjacent to MAS), large variation in both spine (SD = 0.037) and girdle (SD = 0.047)  
347 lengths was observed, although these two traits were strongly correlated ( $r^2 = 0.61$ , Fig. 1,  
348 Supplementary Table 1 and Supplementary Fig. 2). This suggests that a large effect locus  
349 affecting both pelvic spines and girdles segregated in this population at the time of  
350 sampling. In six pond populations (*viz.* ABB, KAR, KRK, NAV, HAN, and PYÖ; Fig.  
351 1), relative spine (mean = 0.079) and girdle (mean = 0.15) lengths were only slightly  
352 smaller relative to the marine populations (0.11 and 0.16 for spine and girdle lengths,  
353 respectively; Supplementary Table 1). A lack of pelvic reduction (relative to the marine  
354 populations) was observed only in one pond population (KAR; Fig. 1, Supplementary  
355 Table 1 and Supplementary Fig. 2).

356

### 357 *QTL mapping of pelvic reduction in the Helsinki × Rytilampi cross*

358 After LD-network based complexity reduction, all QTL mapping analyses were  
359 performed on 241 PCs (six sex-linked PCs were removed). Re-analyses of the 279 F<sub>2</sub>  
360 progeny from the HEL × RYT cross confirmed a single QTL region on LG7 for both  
361 pelvic spine and girdle lengths in the single-locus analyses (Fig. 2a, b and Table 1). In the  
362 multi-locus analyses (absolute trait values), LG7 explained 74–86% of the PVE for both

363 spine and girdle lengths, while all other chromosomes individually explained less than  
364 3% of the phenotypic variance (Table 2). An approximately equal amount of the  
365 phenotypic variance was explained by alleles inherited from the F<sub>0</sub> male (pond  
366 individual) and the F<sub>0</sub> female (marine individual; ~30% of the total variance for all traits;  
367 Table 2), respectively, with 15–21% of the phenotypic variance also explained by  
368 dominance effects. This is the expected outcome for a recessive QTL when the F<sub>0</sub>  
369 individuals are fixed for different large effect causal alleles, and when no additional  
370 smaller effect loci affect the trait (Klug and Cummings 2018).

371

372 *QTL mapping of pelvic reduction in the Helsinki × Bynästjärnen cross*

373 Among the 308 F<sub>2</sub> progeny of the HEL × BYN cross, single-locus mapping analyses of  
374 pelvic spine lengths detected two significant QTL on LG15 (PVE = 8.9%) and LG16  
375 (PVE = 13.7%; Fig. 2c, Table 1 and 2) for alleles deriving from the F<sub>0</sub> male (pond  
376 individual). Thus, the causal alleles for these QTL segregated in the F<sub>0</sub> pond male (as  
377 explained in Supplementary File 1). No dominance effects were detected for these QTL,  
378 suggesting that the allelic effects were additive. One QTL on LG6 with an allelic effect  
379 deriving only from the F<sub>0</sub> female was also detected (Fig. 2c and Table 1). The QTL  
380 significance profiles, in particular for LG15 and LG16, spanned large genomic regions  
381 with no obvious peaks (in contrast to LG7 in the HEL × RYT cross; Fig. 2a, b). This  
382 remained true when analysing all SNPs individually (fine-mapping; Supplementary Fig.  
383 4). The individual and multi-locus phenotypic effects on spine lengths for the QTL on  
384 LGs 6, 15 and 16 (using the most significant QTL for each QTL region) are detailed in

385 Figure 3. In the absence of any large effect loci, and when all QTL are additive and  
386 independent (as is the case here), phenotypes in the F<sub>2</sub> generation are expected to be  
387 normally distributed (Klug and Cummings 2018). For some multi-locus genotypes (of the  
388 QTL on LGs 6, 15 and 16), the distribution of spine lengths was approximately normally  
389 distributed, except the highly reduced spine lengths, which had long tails, implicating that  
390 some of these loci could be involved in epistatic interactions (this was investigated  
391 further in Supplementary File 6). One significant male QTL on LG4 for girdle length was  
392 also detected (Fig. 2d and Table 1). Results for relative trait values were highly similar to  
393 the absolute trait values, except for an additional significant male and female QTL on  
394 LG1, as well as another significant female QTL on LG16 (Supplementary Fig. 5, Table 1  
395 and Supplementary Table 3).

396 Multi-locus analyses (for absolute trait values) identified 11 LGs that accounted  
397 for at least 3% of the phenotypic variance in pelvic spine or girdle lengths in the HEL ×  
398 BYN cross (Table 2). The largest of these effects were found on LG15 and LG16, which  
399 explained 9% and 12% of the variation in pelvic spine lengths, respectively (Table 2). For  
400 pelvic spine and girdle lengths, 39% and 32% of the PVE, respectively, were accounted  
401 for by all SNPs in the dataset, which equates to the narrow sense heritability ( $h^2$ ) also  
402 accounting for dominance (but not epistatic interaction) effects. For spine lengths, 24% of  
403 the total PVE was attributed to alleles deriving from the F<sub>0</sub> male, and 17% was attributed  
404 to alleles deriving from the F<sub>0</sub> female; only 1% was attributed to the dominance effect  
405 (Table 2). For girdle lengths, the corresponding numbers were 16%, 6% and 13% (Table  
406 2).

407

408 *QTL mapping of pelvic reduction in the Helsinki × Pyöreälampi cross*

409 In the HEL × PYÖ cross (283 F<sub>2</sub> individuals), one QTL for spine length was found on  
410 LG9, which was explained by alleles inherited from the F<sub>0</sub> male. Two significant QTL for  
411 girdle length were found, one on LG19 (explained by alleles inherited from the F<sub>0</sub> male)  
412 and the other on LG4 (explained by alleles inherited from the F<sub>0</sub> female; Fig. 2f and  
413 Table 1). In the multi-locus analyses, the PVE for different LGs mirrored these results;  
414 the LGs that contain significant QTL explain most of the PVE, while PVE for all other  
415 LGs were <4% (Table 2). Overall, the multi-locus analyses revealed that PVE for pelvic  
416 traits was lower than in the HEL × BYN cross; 14% and 16% for spine length and girdle  
417 length, respectively, with <2% PVE due to dominance effects (Table 2). When analysing  
418 relative trait values, one additional female QTL peak was found for both girdle and spine  
419 lengths on LG1 (Supplementary Fig. 5, Table 1 and Supplementary Table 3). Due to the  
420 large size of the identified QTL regions, it is not possible to know whether this QTL and  
421 that on LG1 detected in the HEL × BYN cross are due to the same or different underlying  
422 causal mutations (we consider this as a single QTL region).

423

424 *Trait correlations in the QTL crosses*

425 There was a strong correlation between relative pelvic spine and girdle lengths ( $r^2 = 0.85$ ,  
426 Fig. 1, Supplementary Fig. 2 and Supplementary Table 1) in the HEL × RYT cross as  
427 expected, since pelvic reduction in this cross is controlled by a single large effect QTL  
428 affecting both traits. However, in the HEL × BYN cross, correlation between relative

429 pelvic spine and girdle lengths was much weaker ( $r^2 = 0.11$ , Fig. 1, Supplementary Fig. 2  
430 and Supplementary Table 1). This finding is consistent with pelvic spine and girdle  
431 reductions being independently controlled by different QTL. Furthermore, of the 306 F<sub>2</sub>  
432 individuals, only four displayed complete lack of spines, despite the fact that the BYN  
433 population is fixed for complete spine reduction in the wild (and the spine was absent in  
434 the F<sub>0</sub> male). This is consistent with spine length being controlled by multiple additive  
435 loci in the HEL × BYN cross. Among the F<sub>2</sub> individuals from the HEL × BYN cross,  
436 relative girdle lengths were normally distributed with much smaller variances (SD =  
437 0.012) compared to the HEL × RYT cross (SD = 0.041), with only two individuals with  
438 reduced girdles (Fig. 1, Supplementary Fig. 2 and Supplementary Table 1). This is  
439 consistent with the lower heritability of pelvic girdle lengths in the HEL × BYN  
440 compared to the HEL × RYT cross, with contributions from many small effect loci. In the  
441 HEL × PYÖ cross, phenotypic variation was comparable to that in the HEL × BYN cross  
442 (SD = 0.012), although the mean relative spine length was slightly smaller (0.078 vs  
443 0.091; Supplementary Table 1) and the mean for relative girdle length was slightly larger  
444 (0.175 vs 0.169; Supplementary Fig. 2; Supplementary Table 1).

445

#### 446 *Scanning for Pel deletions in the full-genome sequence data*

447 In the full-genome re-sequencing data of wild-collected individuals, a large deletion  
448 upstream of *Pitx1* was fixed for all 21 individuals from Rytilampi, where pelvic reduction  
449 maps to this region (Fig. 4). The deletion is around 3.5 kb in size and fully encompasses  
450 the Pel-2.5kb<sup>SALR</sup> region of the three-spined stickleback (Chan *et al.* 2010). No

451 comparable deletion was found in any other individuals in the dataset (Fig. 4b). This  
452 included the two White Sea populations, in which either complete reduction of both the  
453 pelvic spines and girdles was observed (MAS), or a putative large effect locus affecting  
454 both spine and girdle length was found to be segregating (BOL; Fig. 1; Supplementary  
455 Fig. 2 and Supplementary Table 1).

456

#### 457 *Candidate genes*

458 Seven candidate genes or regulatory elements for pelvic reduction identified from the  
459 literature (Supplementary Table 4) were found in the LGs with significant QTL (Fig. 2).  
460 *Hif1a* (Mudie *et al.* 2014), *Pel* (Chan *et al.* 2010) and *Pou1f1* (Kelberman *et al.* 2009) are  
461 known to regulate the expression of *Pitx1*, whereas four genes (*Fgf8*, *Wnt8c*, *Wnt8b* and  
462 *Hoxd9*) are involved in the pelvic fin/hind limb development downstream of *Pitx1* (Don  
463 *et al.* 2012; Tanaka *et al.* 2005). However, aside from *Pel* (LG7), only three – *Wnt8c*  
464 (LG6), *Hif1a* (LG15) and *Pou1f1* (LG16) – were clearly within the significant QTL  
465 regions (Fig. 2). One candidate locus, *Hif1a*, is also on LG1 where significant QTL peaks  
466 were found when analysing relative (but not absolute) trait values (Table 1 and  
467 Supplementary Fig. 5).

468

#### 469 *Simulations*

470 In the empirical data from the marine populations, IBD (the slope of the regression line  
471 between linearised  $F_{ST}$  and geographic distance point distance in km) was  $2.13^{-7}$  (95% of

472 the  $1e^6$  bootstrap replicates were between  $2.05^{-7}$  and  $2.2^{-7}$ ) for nine-spined sticklebacks,  
473 and  $1.53^{-8}$  (95% of the bootstrap replicates were between  $1.10^{-8}$  and  $1.96^{-8}$ ) for three-  
474 spined sticklebacks. Thus, the slope of the IBD regression line in this dataset was 13.9  
475 times higher for nine-spined sticklebacks compared to three-spined sticklebacks (Fig. 5a).  
476 The geographic distance (which is on an arbitrary scale) in the simulated data was scaled  
477 based on the observed levels of IBD in the empirical data. This resulted in the distance  
478 between the two simulated marine populations furthest away from each other (i.e. the  
479 marine populations from which the focal freshwater populations were founded)  
480 corresponding to 264 km and 352 km for three- and nine-spined sticklebacks,  
481 respectively (Fig. 5a). Thus, with comparable levels of IBD as in the empirical data, our  
482 simulations mimic the levels of parallel evolution that can be expected in three- and nine-  
483 spined sticklebacks at relatively short geographic scales (<400 km). The difference in  
484 IBD between the two species is also close to that in the empirical data (264/352 km =  
485 0.75). In the empirical data, genetic differentiation between freshwater habitats for  
486 populations <400 km from each other (mean  $F_{ST}$  = 0.19 and 0.49 for three- and nine-  
487 spined sticklebacks, respectively) was also on par with the simulations (mean [across  
488 simulation replicates]  $F_{ST}$  = 0.21 and 0.58, respectively). Notably,  $F_{ST}$  was >0.8  
489 (linearised  $F_{ST}$ >4) between Pyöreälampi (no pelvic reduction) and Ryttilampi (pelvic  
490 reduction controlled by *Pitx1/Pel*), although these ponds are situated only 15 km from  
491 each other (Fig. 5a; max and median  $F_{ST}$  = 0.96 and 0.62, respectively, for all pairwise  
492 freshwater-freshwater comparisons). This is higher than the  $F_{ST}$  between any pair of  
493 three-spined stickleback populations in the data (max = 0.78 and median = 0.26 for all

494 pairwise freshwater-freshwater comparisons).

495

496 *Do population demographic parameters influence local adaptation?*

497 In the simulations (Supplementary File 5), the relationship between marine-freshwater  
498  $F_{ST}$  and freshwater-freshwater  $F_{ST}$  depended on both the species and genetic architecture  
499 (Fig. 5b). For instance, when the genetic architecture included one additive large effect  
500 locus (architecture A; heterozygotes for this locus were 100% locally adapted to  
501 freshwater), this locus was often involved in parallel evolution when population structure  
502 was parameterised based on three-spined sticklebacks (65% of replicates,  $n = 100$ ), but  
503 not when population structure was parameterised based on nine-spined sticklebacks (3%  
504 of the replicates). In 20% of the replicates for both species, the freshwater allele for this  
505 locus was fixed in only one of the focal freshwater populations (i.e. local adaptation, but  
506 not parallel evolution). When the trait under selection was controlled by several medium  
507 effect loci (architecture B), parallel evolution was more common in both stickleback  
508 scenarios, particularly for the locus with the largest allelic value (20% and 80% for nine-  
509 and three-spined sticklebacks, respectively; Fig. 5b, c; heterozygotes for this locus were  
510 60% locally adapted to freshwater). Local adaptation also occurred in 57% of the  
511 replicates in the nine-spine stickleback-like scenario, and in 18% in the 3-sp (Fig. 5b, c).  
512 For the locus with the second highest allelic value in architecture B (heterozygotes for  
513 this locus were 40% locally adapted to freshwater), the cases of both parallel evolution  
514 and local adaptation collectively dropped to 38% and 43% three and nine-spined like  
515 stickleback scenarios, respectively. With one non-additive large effect locus with



516 recessive alleles locally adapted to freshwater (architecture C), this locus was less likely  
517 to be involved in parallel evolution in the three-spined stickleback-like scenario (48%),  
518 compared to architecture A. However, results for the nine-spined stickleback-like  
519 scenario was similar to architecture A (6% parallel evolution; Fig. 5b, c). Thus, at  
520 relatively short (<400 km) geographical distances, parallel evolution is an expected  
521 outcome in three- but not nine-spined stickleback-like scenarios, particularly when a  
522 single additive large effect locus is responsible for freshwater adaptation. Results  
523 addressing the questions of how local adaptation depend on ancestral allele frequency are  
524 presented in Supplementary File 7.

525

## 526 **Discussion**

527 The results demonstrate that pelvic reduction in nine-spined sticklebacks is not nearly as  
528 common as in three-spined sticklebacks, and when it does exist, the genetic basis is more  
529 variable in nine-spined sticklebacks compared to three-spined sticklebacks. This is  
530 consistent with the re-analyses of neutral population genomic data showing that both IBD  
531 in the sea and the genetic structure among marine populations are >10 times higher in  
532 nine-spined sticklebacks, causing heterogeneity in the distribution of standing genetic  
533 variation that is not present to the same extent in the marine three-spined stickleback  
534 populations. Thus, the level and distribution of ancestral variation available for local  
535 adaptation (and also for parallel phenotypic evolution) is likely a function of population  
536 demographic parameters, with local adaptation being less likely in poorly connected  
537 species, as suggested by Merilä (2013, 2014) and corroborated by our simulations.

538 However, other non-mutually exclusive factors, such as the genetic architecture (i.e.  
539 dominance effects, heritability, mutation rates and numbers of causal loci involved), as  
540 well as non-parallelism in phenotypic selection optima are also likely to play roles. In the  
541 following, we discuss the possible causes of the discrepancy in pelvic structure  
542 development between nine- and three-spined sticklebacks, as well as their implications to  
543 our understanding of adaptive evolution in the wild.

544

545 *Can the genetic architecture of pelvic reduction be explained by population demographic*  
546 *parameters?*

547 Together with earlier QTL studies (Shapiro *et al.* 2006, 2009; Shikano *et al.* 2013), we  
548 show that multiple genomic regions (11 QTL, ten of which are novel to this study) are  
549 associated with pelvic reduction in nine-spined sticklebacks across their distribution  
550 range. Only one small effect QTL region (LG1; Table 1 and Supplementary Fig. 5) was  
551 shared between any two crosses (HEL × BYN and HEL × PYÖ) in our study, but even  
552 here it is not certain that the underlying causal mutations are the same. Although the high  
553 frequency of *Pel* deletions (disrupting pelvic armour development) means that most of  
554 the deletions associated with pelvic reduction in three-spined sticklebacks are  
555 independently derived (Xie *et al.* 2019), *Pitx1/Pel* is nevertheless predominantly  
556 responsible for pelvic reduction in three-spined sticklebacks (Chan *et al.* 2010; Xie *et al.*  
557 2019). In contrast, the major effect and recessive *Pitx1/Pel* allele in nine-spined  
558 sticklebacks is known to be responsible for pelvic reduction in only one Canadian  
559 population and Ryttilampi. In both Bynästjärnen and Pyöreälampi, pelvic reduction is less

560 heritable, polygenic and additive. In addition, based on morphological data, it seems  
561 likely that major effect loci not associated with *Pel*-deletions (Fig. 4) control pelvic  
562 reduction in two Russian ponds, with one additional Alaskan population being controlled  
563 by a large effect additive locus mapping to LG4 (Shapiro *et al.* 2009). We do not yet  
564 know the mutation rate of the *Pel*-deletions in nine-spined sticklebacks. Regardless,  
565 pelvic reduction in the nine-spined stickleback is much less common than in three-spined  
566 sticklebacks in general (Klepaker *et al.* 2013), and when it occurs, the QTL that control  
567 pelvic reduction are much more variable with respect to heritability, effect size  
568 distribution and dominance relationships. Assuming that selection for pelvic reduction in  
569 nine-spined stickleback freshwater populations is universal (see below), such a pattern is  
570 consistent with poor connectivity, causing heterogeneity in the patterns of standing  
571 genetic variation. This would restrict local adaptation, and hence, also parallel phenotypic  
572 evolution. However, the focus of this study is on the role of population demographic  
573 parameters on local adaptation from standing genetic variation, regardless of whether the  
574 alleles that confer freshwater adaptations are identical by descent (e.g. EDA) or  
575 independently derived (e.g. *Pel*-deletions in three-spined sticklebacks), and only  
576 secondarily on parallelism (i.e. when the same trait is locally adapted in multiple  
577 independently colonised populations, regardless of genetic architecture).

578         It has been shown that multiple independent alleles for the same adaptation can  
579 temporarily co-exist in structured populations, causing heterogeneity in standing genetic  
580 variation across the distribution range of a species. This can be true when considering the  
581 dynamics of novel mutations (Ralph and Coop 2010) or neutral alleles segregating in the

582 population before they become adaptive (Ralph and Coop 2015a). However, these studies  
583 assume uniform selection across single continuous populations and thus do not consider  
584 the scenario where locally adapted freshwater alleles – which can be different in different  
585 parts of the distribution range – are continually introduced to the sea. Furthermore,  
586 simulations showing that the probability of local parallel evolution depends on the  
587 migration rate from the sea (Galloway and Cresko 2019) or from other populations of the  
588 same habitat (Ralph and Coop 2015b) implicitly assume a homogenous pool of ancestral  
589 standing genetic variation. Our simulations show that local adaptation is also a function  
590 of the allele frequency in the founding marine population; with stronger IBD in the sea,  
591 standing genetic variation in the ancestral marine population was a stronger bottleneck  
592 for parameters that resulted in nine-spined stickleback-like population structure (9-sp)  
593 than for parameters that resulted in three-spined stickleback-like population structure (3-  
594 sp; Supplementary Figures 7 and 8). Particularly for smaller effect loci, there was a  
595 stronger dependence between the allele frequency in the ancestral marine population and  
596 local adaptation in 9- compared to 3-sp, indicating that smaller effect QTL have a  
597 stronger influence on local adaptation in 9- compared to 3-sp (Supplementary Figures 7  
598 and 8). This resulted in more polygenic and/or less complete local adaptation in 9-  
599 compared to 3-sp (Supplementary Figures 7 and 8).

600 While our simulation results match closely with estimates of population structure  
601 and IBD in the empirical data, these simulations explore only a small proportion of the  
602 possible parameter space with respect to selection intensity, effective population sizes  
603 and migration rates (detailed in Supplementary File 5). We also assume that all parallel

604 evolution is due to standing genetic variation of alleles that are identical by descent (since  
605 mutation rate is low), whereas it is known that pelvic reduction in three-spined  
606 sticklebacks is, to a large extent, due to independently derived *Pel*-deletions attributable  
607 to high mutation rates (Xie *et al.* 2019). Nevertheless, most three-spined stickleback  
608 studies indicate that freshwater adaptation is indeed chiefly due to alleles identical by  
609 descent that have segregated in the population for millions of years (e.g. Jones *et al.*  
610 2012; Nelson and Cresko 2018), making *Pitx1* an exception. In the case of nine-spined  
611 sticklebacks, *Pitx1* is with certainty associated with pelvic reduction in only two of all  
612 studied populations, suggesting a minor role for recurrent mutation in determining pelvic  
613 reduction in this species. While our simulations demonstrate that heterogeneous patterns  
614 of standing genetic variation can limit local adaptation in species characterized by low  
615 connectivity, further simulations with a wider parameter space could be helpful in  
616 advancing our understanding of the limits of adaptation in small and structured  
617 populations/species.

618

#### 619 *Geographic heterogeneity in selection optima*

620 The high heterogeneity in the genetic architecture of pelvic reduction in the nine-spined  
621 stickleback can alternatively be attributed to within habitat environmental variation  
622 resulting in different selection optima in different pond populations (cf. Stuart *et al.* 2017;  
623 Thompson *et al.* 2019). For example, the small differences between pelvic reduced  
624 phenotypes in our study (e.g. in BYN and MAS/BOL spines are completely absent, while  
625 in RYT they are only strongly reduced; Fig. 1, Supplementary Table 1 and

626 Supplementary Fig. 2) could in fact indicate different selection optima in the different  
627 populations (Stuart *et al.* 2017; Thompson *et al.* 2019). It is possible to use available  
628 phenotypic data to estimate the phenotypic optima of pelvic morphology (hypersphere) in  
629 each of the populations using Fisher's geometric model (Stuart *et al.* 2017; Thompson *et*  
630 *al.* 2019), where a strong overlap would suggest a higher probability of genetic  
631 parallelism (Thompson *et al.* 2019). However, this assumes that the populations have  
632 access to exactly the same ancestral variation and are free to evolve and reach their  
633 optima, which is at odds with the results presented here. Without detailed environmental  
634 data or direct estimates of strength of selection on pelvic phenotypes, disentangling the  
635 effects of gene flow and within habitat environmental variation (assuming this leads to  
636 non-parallel angles of selection) is not possible (Stuart *et al.* 2017).

637         In a recent simulation study, Thompson *et al.* (2019) showed that genetic  
638 parallelism from standing genetic variation rapidly declines as selection changes from  
639 fully parallel (optima angle of  $0^\circ$ ) to divergent (optima angle of  $180^\circ$ ), especially when  
640 the trait is polygenic. However, although selection was fully parallel in our simulations,  
641 we did not observe strong genetic parallelism for smaller effect loci (with allelic effects <  
642 6) in both the three- and nine-spined stickleback-like scenarios (Fig. 5b, c). This suggests  
643 that the effects of the underlying genetic architecture on parallelism (in conjunction with  
644 some IBD and population structuring) can be independent of the angle of optimal  
645 phenotypes between two habitats. In other words, non-parallelism in selection optima is  
646 not necessary to explain non-parallelism at the phenotypic and genetic levels. Thus, it is  
647 important not to disregard the population demographic setting as a factor that could

648 severely restrict heritability for adaptation and/or constrain adaptation to less optimal  
649 solutions. Evolutionary studies of species with population demographic parameters  
650 comparable to those typical for vulnerable or endangered species/populations, such as the  
651 nine-spined stickleback, would be valuable to gain a better understanding of how such  
652 species may respond to environmental changes and urbanisation (Thompson *et al.* 2018).

653

654 *Pelvic reduction outside marine-freshwater study systems*

655 While the evidence for genetic parallelism on large geographical scales in the marine-  
656 freshwater stickleback model system is extensive (Colosimo *et al.* 2005; Jones *et al.*  
657 2012; Terekhanova *et al.* 2014, 2019; Nelson and Cresko 2018; Fang *et al.* 2019), the  
658 level of parallelism in lake-stream and pelagic-benthic ecotype pairs of three-spined  
659 sticklebacks is much more diverse (Peichel *et al.* 2001, 2017; Conte *et al.* 2012, 2015;  
660 Stuart *et al.* 2017). For instance, Conte *et al.* (2015) found that among benthic-limnetic  
661 three-spined stickleback pairs from Paxton and Priest lakes (Vancouver Island, BC,  
662 Canada), 76% of 42 phenotypic traits diverged in the same direction, whereas only 49%  
663 of the underlying QTL evolved in parallel in both lakes. For highly parallel traits in two  
664 other pairs of benthic-limnetic sticklebacks, only 32% of the underlying QTL were shared  
665 (Conte *et al.* 2012). Similarly, Stuart *et al.* (2017) found that among 11 evolutionary  
666 independent replicate pairs of lake-stream three-spined stickleback populations  
667 (Vancouver Island, BC, Canada), both within habitat variation and constraints to gene  
668 flow contributed to the observed variation in levels of phenotypic parallelism. Different  
669 lakes and streams likely do not have similar access to the same global pool of ancestral

670 variation as pairs of marine-freshwater three-spined sticklebacks, where gene flow in the  
671 sea is high. This is consistent with the notion that more heterogeneous access to ancestral  
672 variation can indeed limit genetic parallelism. This is also true for one example of  
673 marine-freshwater three-spined stickleback divergence among isolated insular freshwater  
674 populations in the Haida Gwaii archipelago off the northern Pacific coast of Canada  
675 (Deagle *et al.* 2013). Here, similar to the nine-spined sticklebacks in this study, several  
676 freshwater populations did not display any reduction in pelvic armour. However, those  
677 populations that were fully plated were also genetically more similar to adjacent marine  
678 individuals, suggesting that recent marine-freshwater admixture and/or selection  
679 favouring plated freshwater individuals could explain this pattern. Thus, with respect to  
680 access to ancestral variation available for freshwater adaptation, nine-spined sticklebacks  
681 are likely closer to the three-spined stickleback lake-stream and benthic-limnetic study  
682 systems than to the three-spined stickleback marine-freshwater study system. The only  
683 notable exception is the lake-stream three-spined sticklebacks mentioned above, where  
684 genetic structuring also is high.

685

#### 686 *Epistatic control of pelvic reduction?*

687 For traits with more than one additive QTL of equal effect sizes, the  $F_2$  phenotypes are  
688 expected to be normally distributed with a mean close to that of the mean for the parents  
689 (Klug and Cummings 2018). This was not the case for spine length in the HEL  $\times$  BYN  
690 cross, which was controlled by three QTL with similar effect sizes. In this case, the bulk  
691 of the phenotypic values was centred around the mean, but also had a long tail of



692 individuals with strongly reduced pelvic spines (Fig. 1, Fig. 3 and Supplementary Fig. 2).  
693 This skew in the phenotype distribution could be caused by epistatic interactions among  
694 loci controlling pelvic spine length (Wolf *et al.* 2000). Consistent with this hypothesis,  
695 complete spine reduction most likely occurred when the allele responsible for spine  
696 reduction for the LG6 QTL was combined with at least one allele causing spine reduction  
697 from the LG15 and LG16 QTL (Fig. 3b and Supplementary File 3). If a threshold number  
698 of alleles are needed for complete pelvic reduction, this could also explain how standing  
699 genetic variation in the sea is maintained, as the necessary multi-locus genotypes that  
700 cause sub-optimal phenotypes in the sea are rarely formed, due to overall lower  
701 frequencies of spine-reducing alleles in the sea. This is analogous to “epistatic shielding”  
702 that can contribute to the persistence of disease alleles in populations (Phillips and  
703 Johnsson 1998; Phillips 2008). Consistent with this possibility, LG6 of the F<sub>0</sub> female of  
704 the HEL × BYN cross (from the sea) was polymorphic for the pelvic spine QTL effect  
705 (Fig. 2) – evidently, a single pelvic-reducing allele alone in this female was not enough to  
706 cause any pelvic reduction at all (this female had a complete pelvis).

707

### 708 *Candidate genes*

709 While the QTL peak for the *Pitx1/Pel* region in the HEL × RYT cross was narrow, this  
710 was not the case for the other QTL we detected. Hence, due to the large QTL regions  
711 detected by four-way single-mapping analyses, it was not meaningful to perform gene  
712 ontology enrichment (GO) analyses – the QTL regions would have contained possibly  
713 thousands of genes. Instead, we searched the literature for known candidate genes related

714 to pelvic reduction, and found three (excluding *Pitx1/Pel*) that were clearly contained  
715 within the identified QTL regions (Fig. 2 and Supplementary Table 4). Due to the  
716 aforementioned large QTL regions, these can only be considered as highly putative  
717 candidate genes for pelvic reduction and will not be discussed further. However, further  
718 studies of pelvic reduction might find these candidates worthy of attention.

719

## 720 *Conclusions*

721 Our results show that the repeated parallel reduction in pelvic structures in freshwater  
722 populations of nine-spined sticklebacks is due to a diverse set of genetic changes: only  
723 one small effect QTL for pelvic reduction was shared between the three experimental  
724 crosses in this study. In one cross, pelvic reduction was mapped to the previously  
725 identified *Pitx1/Pel* regions, but in the other two crosses, the genetic basis of pelvic  
726 reduction was polygenic, and mapped to many different chromosomes. In addition to  
727 these, yet another large effect QTL different from the *Pitx1/Pel* locus likely segregates in  
728 one nine-spined stickleback population, which is yet to be identified. The results also  
729 shed light on the possible drivers of the observed genetic heterogeneity underlying pelvic  
730 reduction; as shown by simulations, heterogeneous genetic architectures are more likely  
731 to emerge when access to ancestral variation is limited by strong isolation by distance and  
732 population structuring. This reinforces the role of the nine-spined sticklebacks as a useful  
733 model system, alongside the three-spined stickleback, to study adaptive evolution in the  
734 wild. Furthermore, since the population demographic characteristics of nine-spined  
735 sticklebacks are similar to small and endangered species/populations, it is also likely to

736 be a well-suited model to study the genetics of adaptation in populations of conservation  
737 concern.

### 738 **Acknowledgments**

739 We thank Alexandre Budria, Chris Eberlein, Sami Karja, Heini Natri and Ismo  
740 Rautiainen for help in fish collection and/or rearing. Thanks are also due to Kirsi  
741 Kähkönen for help in laboratory, and Oulanka Biological Station (University of Oulu) for  
742 logistic support. We are grateful for the computing resource support from CSC – the  
743 Finnish IT Center for Science Ltd administered by the Ministry of Education and Culture,  
744 Finland. B.G. thanks support from CAS Pioneer Hundred Talents Program and the  
745 National Natural Science Foundation of China (31672273). This work is supported by the  
746 Academy of Finland (grant numbers, 129662, 134728 and 218343 to J.M.), a grant from  
747 Helsinki Institute of Life Science (HiLIFE to JM) and a personal grant to Petri  
748 Kemppainen from the Finnish Cultural Foundation (00190489).

749

### 750 **Literature cited**

751 Arendt, J., and D. Reznick. 2007. Convergence and parallelism reconsidered: what have  
752 we learned about the genetics of adaptation? *Trends Ecol. Evol.* 23: 26–32.  
753 <https://doi.org/10.1016/j.tree.2007.09.011>

754 Barrett, R. D. H., and D. Schluter. 2008. Adaptation from standing genetic variation.  
755 *Trends Ecol. Evol.* 23: 38–44. <https://doi.org/10.1016/j.tree.2007.09.008>

756 Becker, W. A. 1984. *Manual of quantitative genetics* (Fourth ed.). Academic enterprises,  
757 Washington.

758 Bell, M. A., and S. A. Foster (Eds). 1994. *The evolutionary biology of the threespine*  
759 *Stickleback*. Oxford University Press, Oxford.

- 760 Bell, M. A., Khalef, V., and M. Travis. 2007. Directional asymmetry of pelvic vestiges in  
761 threespine stickleback. *J. Exp. Zool. Part B, Mol. Dev. Evol.* 308B: 189–199.  
762 <https://doi.org/10.1002/jez.b>
- 763 Bell, M. A., Orti, G., Walker, J. A., and J.P. Koenings. 1993. Evolution of pelvic  
764 reduction in threespine stickleback fish: a test of competing hypotheses. *Evolution*  
765 47: 906–914. <https://doi.org/10.2307/2410193>
- 766 Bell, M. A., Windsor, E. A., and Buck, N. J. 2004. Twelve years of contemporary  
767 evolution in a threespine stickleback population. *Evolution* 58: 814–24. 10.1554/03-  
768 373.
- 769 Blouw, D. M., and G.J. Boyd. 1992. Inheritance of reduction, loss, and asymmetry of the  
770 pelvis in *Pungitius pungitius* (ninespine stickleback). *Heredity*, 68: 33–42.  
771 <https://doi.org/10.1038/hdy.1992.4>
- 772 Bolnick, D. I., Barrett, R. D. H., Oke, K. B., Rennison, D. J., and Y.E. Stuart. 2018.  
773 (Non) Parallel Evolution. *Annu. Rev. Ecol. Evol. Syst.* 12: 303–330.
- 774 Chan, Y. F., Marks, M. E., Jones, F. C., Jr, G. V., Shapiro, M. D., Brady, S. D., ... D.M.  
775 Kingsley. 2010. Adaptive evolution of pelvic reduction in sticklebacks by recurrent  
776 deletion of a *Pitx1* enhancer. *Science* 327: 302–305.
- 777 Cohan, F. M. 1984. Can uniform selection retard random genetic divergence between  
778 isolated conspecific populations? *Evolution* 38: 495–504.  
779 <https://doi.org/10.2307/2408699>
- 780 Colosimo, P. F., Hosemann, K. E., Balabhadra, S., Villarreal, G., Dickson, H.,  
781 Grimwood, J., ... D.M. Kingsley. 2005. Widespread parallel evolution in  
782 sticklebacks by repeated fixation of ectodysplasin alleles. *Science* 307: 1928–1933.  
783 <https://doi.org/10.1126/science.1107239>
- 784 Conte, G. L., Arnegard, M. E., Best, J., Chan, Y. F., Jones, F. C., Kingsley, D. M., ...  
785 C.L. Peichel. 2015. Extent of QTL reuse during repeated phenotypic divergence of  
786 sympatric threespine stickleback. *Genetics* 201: 1189–1200.  
787 <https://doi.org/10.1534/genetics.115.182550>
- 788 Conte, G. L., Arnegard, M. E., Peichel, C. L., and D. Schluter. 2012. The probability of  
789 genetic parallelism and convergence in natural populations. *Proc. R. Soc B.* 279:  
790 5039–5047. <https://doi.org/10.1098/rspb.2012.2146>

- 791 Coyle, S. M., Huntingford, F. A., and C.L. Peichel. 2007. Parallel evolution of Pitx1  
792 underlies pelvic reduction in Scottish Threespine Stickleback (*Gasterosteus*  
793 *aculeatus*). *Genetics* 98: 581–586. <https://doi.org/10.1093/jhered/esm066>
- 794 Cresko, W. A., Amores, A., Wilson, C., Murphy, J., Currey, M., Phillips, P., ... J.H.  
795 Postlethwait. 2004. Parallel genetic basis for repeated evolution of armor loss in  
796 Alaskan threespine stickleback populations. *Proc. Natl. Acad. Sci. USA* 101: 6050–  
797 6055.
- 798 Deagle, B. E., Jones, F., Chan, Y. F., Absher, D. M., Kingsley, D. M., and T. E.  
799 Reimchen. 2012. Population genomics of parallel phenotypic evolution in  
800 stickleback across stream–lake ecological transitions. *Proc. R. Soc. B* 279: 1277–  
801 1286 doi:10.1098/rspb.2011.1552
- 802 Deagle, B. E., Jones, F. C., Absher, D. M., Kingsley, D. M., and T. E. Reimchen. 2013.  
803 Phylogeography and adaptation genetics of stickleback from the Haida Gwaii  
804 archipelago revealed using genome-wide single nucleotide polymorphism  
805 genotyping. *Mol. Ecol.* 22: 1917–1932. <https://doi.org/10.1111/mec.12215>
- 806 DeFaveri, J., Shikano, T., Ghani, N. I. A., and J. Merilä. 2012. Contrasting population  
807 structures in two sympatric fishes in the Baltic Sea basin. *Mar. Biol.* 159: 1659–  
808 1672. <https://doi.org/10.1007/s00227-012-1951-4>
- 809 Don, E. K., Currie, P. D., and N. J. Cole. 2012. The evolutionary history of the  
810 development of the pelvic fin/hindlimb. *J. Anatomy* 222: 114–133.  
811 <https://doi.org/10.1111/j.1469-7580.2012.01557.x>
- 812 Elmer, K. R., and A. Meyer. 2011. Adaptation in the age of ecological genomics: Insights  
813 from parallelism and convergence. *Trends Ecol. Evol.* 26: 298–306.  
814 <https://doi.org/10.1016/j.tree.2011.02.008>
- 815 Fang, F., Kempainen, P., Momigliano, P., and J. Merilä. 2019. Oceans apart:  
816 Heterogeneous patterns of parallel evolution in sticklebacks. *BioRxiv*, doi:  
817 <https://doi.org/10.1101/826412>
- 818 Galloway, J., Cresko, W., and Ralph, P. 2019. A few stickleback suffice for the transport  
819 of alleles to new lakes G3: *Genes Genomes Genetics* 10: 505–514.  
820 <https://dx.doi.org/10.1534/g3.119.400564>
- 821 Gibson, G. 2005. The synthesis and evolution of a super-model. *Science* 307: 1890–1891
- 822 Giles, N. 1983. The possible role of environmental calcium levels during the evolution of  
823 phenotypic diversity in outer Hebridean populations of the Three-spined stickleback,

- 824 *Gasterosteus aculeatus*. J. Zool. 199: 535–544. <https://doi.org/10.1111/j.1469->  
825 [7998.1983.tb05104.x](https://doi.org/10.1111/j.1469-7998.1983.tb05104.x)
- 826 Hahne, F., and R. Ivanek. 2016. Statistical Genomics: Methods and Protocols. In Mathé  
827 E, Davis S (eds.), chapter Visualizing Genomic Data Using Gviz and Bioconductor,  
828 335–351. Springer, New York.
- 829 Herczeg, G., Turtiainen, M., and J. Merilä. 2010. Morphological divergence of North-  
830 European nine-spined sticklebacks (*Pungitius pungitius*): signatures of parallel  
831 evolution. Biol. J. Linn. Soc. 101: 403–416.
- 832 Hermisson, J., and Pennings, P. (2005). Soft sweeps: molecular population genetics of  
833 adaptation from standing genetic variation. Genetics 169: 2335–2352.  
834 <https://dx.doi.org/10.1534/genetics.104.036947>
- 835 Hermisson, J., and P.S. Pennings. 2017. Soft sweeps and beyond: understanding the  
836 patterns and probabilities of selection footprints under rapid adaptation. Methods  
837 Ecol. Evol. 8: 700–716. <https://doi.org/10.1111/2041-210X.12808>
- 838 Hijmans, R.J., and J. van Etten. 2012. raster: Geographic analysis and modeling with  
839 raster data. R package version 2. 0-12. <http://CRAN.R-project.org/package=raster>
- 840 Karhunen, M., Merilä, J., Leinonen, T., Cano, J. M., and O. Ovaskainen. 2013. driftsel:  
841 An R package for detecting signals of natural selection in quantitative traits. Mol.  
842 Ecol. Res. 13: 746–754. <https://doi.org/10.1111/1755-0998.12111>
- 843 Karhunen, M., Ovaskainen, O., Herczeg, G., and Merilä, J. 2014. Bringing habitat  
844 information into statistical tests of local adaptation in quantitative traits: A case  
845 study of nine-spined sticklebacks. Evolution 68: 559–568.
- 846 Kelberman, D., Rizzoti, K., Lovell-Badge, R., Robinson I. C. A. F., and M. T. Dattani.  
847 2009. Genetic regulation of pituitary gland development in human and mouse.  
848 Endocrine Reviews 30: 790–829, <https://doi.org/10.1210/er.2009-0008>
- 849 [dataset] Kemppainen, P., Li, Z., Rastas, P., Löytynoja, A., Fang, F., Yang, J., Guo, B.,  
850 Shikano, T., and Merilä, M.; 2020; Genetic population structure constrains local  
851 adaptation in sticklebacks; Dryad; DOI <https://doi.org/10.5061/dryad.76hdr7str>.
- 852 Kemppainen, P., Knight, C. G., Sarma, D. K., Hlaing, T., Prakash, A., Maung Maung, Y.  
853 N., ... C. Walton. 2015. Linkage disequilibrium network analysis (LDna) gives a  
854 global view of chromosomal inversions, local adaptation and geographic structure.  
855 Mol. Ecol. 15: 1031–1045. <https://doi.org/10.1111/1755-0998.12369>

- 856 Klepaker, T., Østbye, K., and M. A. Bell. 2013. Regressive evolution of the pelvic  
857 complex in stickleback fishes: a study of convergent evolution. *Evol. Ecol. Res.* 15:  
858 413–435.
- 859 Klug, W. S., and M.R. Cummings. 2018. *Concepts of genetics*. Pearson Education, Inc,  
860 New Jersey.
- 861 Laine, V. N., Shikano, T., Herczeg, G., Vilkki, J., and J. Merilä. 2013. Quantitative trait  
862 loci for growth and body size in the nine-spined stickleback *Pungitius pungitius* L.  
863 *Mol. Ecol.* 22: 5861–5876. <https://doi.org/10.1111/mec.12526>
- 864 Leinonen, T., Cano, J. M., and J. Merilä. 2011. Genetics of body shape and armour  
865 variation in threespine sticklebacks. *J. Evol. Biol.* 24: 206–218.  
866 <https://doi.org/10.1111/j.1420-9101.2010.02161.x>
- 867 Lee, K., and Coop, G. 2017. Distinguishing among modes of convergent adaptation using  
868 population genomic data. *Genetics* <https://dx.doi.org/10.1534/genetics.117.300417>
- 869 Li, H. 2018. Sequence analysis Minimap2 : pairwise alignment for nucleotide sequences.  
870 *Bioinformatics* 34: 3094–3100. <https://doi.org/10.1093/bioinformatics/bty191>
- 871 Li, H., Handsaker, B., Wysoker, A., Fennell, T., Ruan, J., Homer, N., ... T. Sam. 2009.  
872 The Sequence Alignment / Map format and SAMtools. *Bioinformatics* 25: 2078–  
873 2079. <https://doi.org/10.1093/bioinformatics/btp352>
- 874 Li, H. 2013. Aligning sequence reads, clone sequences and assembly contigs with BWA-  
875 MEM. [arXiv:1303.3997v2](https://arxiv.org/abs/1303.3997v2) [q-bio.GN]
- 876 Li, Z., Guo, B., Yang, J., Herczeg, G., Gonda, A., Balázs, G., ... J. Merilä. 2017.  
877 Deciphering the genomic architecture of the stickleback brain with a novel  
878 multilocus gene-mapping approach. *Mol. Ecol.* 26: 1557–1575.  
879 <https://doi.org/10.1111/mec.14005>
- 880 Li, Z., Kempainen, P., Rastas, P., and J. Merilä. 2018. Linkage disequilibrium  
881 clustering-based approach for association mapping with tightly linked genome-wide  
882 data. *Mol. Ecol. Res.* 18: 809–824. <https://doi.org/10.1111/1755-0998.12893>
- 883 MacPherson, A., and Nuismer, S. 2016. The probability of parallel genetic evolution  
884 from standing genetic variation. *J. Evol. Biol.* 30: 326–337.  
885 <https://dx.doi.org/10.1111/jeb.13006>

- 886 Merilä, J. 2013. Nine-spined stickleback (*Pungitius pungitius*): An emerging model for  
887 evolutionary biology research. *Ann. NY. Acad. Sci.* 1289: 18–35.  
888 <https://doi.org/10.1111/nyas.12089>
- 889 Merilä, J. 2014. Lakes and ponds as model systems to study parallel evolution. *J. Limnol.*  
890 73: 33–45. <https://doi.org/10.4081/jlimnol.2014.805>
- 891 Mudie, S., Bandarra, D., Batie, M., Biddlestone, J., Ortmann, B., Shmakova, A., ... S.  
892 Rocha. 2014. PITX1, a specificity determinant in the HIF-1 $\alpha$ - mediated  
893 transcriptional response to hypoxia Sharon. *Cell Cycle* 13: 3878–3891.  
894 <https://doi.org/10.4161/15384101.2014.972889>
- 895 Nelson, T. C., and W.A. Cresko. 2018. Ancient genomic variation underlies repeated  
896 ecological adaptation in young stickleback populations. *Evol. Lett.* 2: 9–21.  
897 <https://doi.org/10.1002/evl3.37>
- 898 Neuenschwander, S., Michaud, F., and J. Goudet. 2018. QuantiNemo 2: a Swiss knife to  
899 simulate complex demographic and genetic scenarios, forward and backward in  
900 time. *Bioinformatics* 35: 886–888. <https://doi.org/10.1093/bioinformatics/bty737>
- 901 Orr, H. A., and L. R. Unckless. 2008. Population extinction and the genetics of  
902 adaptation. *Am. Nat.* 172:2, 160–169
- 903 Peichel, C. L., Nereng, K. S., Ohgi, K. A., Cole, B. L. E., Colosimo, P. F., Buerkle, C. A.,  
904 ..., and D.M. Kingsley. 2001. The genetic architecture of divergence between  
905 threespine stickleback species. *Nature* 414: 901–905.
- 906 Phillips, P. C. 2008. Epistasis — the essential role of gene interactions in the structure  
907 and evolution of genetic systems. *Fundamental Concepts in Genetics* 9: 855–867.  
908 <https://doi.org/10.1038/nrg2452>
- 909 Phillips, P. C., and N. A. Johnson. 1998. The population genetics of synthetic lethals.  
910 *Genetics* 150: 449–458.
- 911 Pritchard, J. R., and D. Schluter. 2001. Declining interspecific competition during  
912 character displacement: Summoning the ghost of competition past. *Evol. Ecol. Res.*  
913 3: 209–220.
- 914 Ralph, P., and Coop, G. 2010. Parallel adaptation: one or many waves of advance of an  
915 advantageous allele? *Genetics* 186: 647–68.  
916 <https://dx.doi.org/10.1534/genetics.110.119594>



- 917 Ralph, P., and G. Coop 2015a. Convergent evolution during local adaptation to patchy  
918 landscapes. PLoS Genetics 11: e1005630.  
919 <https://dx.doi.org/10.1371/journal.pgen.1005630>
- 920 Ralph, P., and G. Coop. 2015b. The role of standing variation in geographic convergent  
921 adaptation. Am Nat 186 Suppl 1(S1), S5–23. <https://dx.doi.org/10.1086/682948>
- 922 Rastas, P. 2017. Lep-MAP3: Robust linkage mapping even for low-coverage whole  
923 genome sequencing data. Bioinformatics 33: 3726–3732.  
924 <https://doi.org/10.1093/bioinformatics/btx494>
- 925 Reid, S., Tibshirani, R., and J. Friedman. 2016. A study of error variance estimation in  
926 lasso regression. Stat. Sinica 26: 35–67. <https://www.jstor.org/stable/24721190>
- 927 Reimchen, T. E. 1983. Structural relationships between spines and lateral plates in  
928 threespine Stickleback (*Gasterosteus aculeatus*). Evolution 37: 931–946.  
929 <https://doi.org/10.2307/2408408>
- 930 Reist, J. D. 1980. Predation upon pelvic phenotypes of brook stickleback, *Culaea*  
931 *inconstans*, by selected invertebrates. Can. J. Zool. 58: 1253–1258.
- 932 Rogers, S. M., Tamkee, P., Summers, B., Balabhadra, S., Marks, M., Kingsley, D. M.,  
933 and D. Schluter. 2012. Genetic signatures of adaptive peakshift in threespine  
934 sticklebacks. Evolution 66: 2439–2450.
- 935 Rosenblum, E. B., Parent, C. E., and E. E. Brandt. 2014. The molecular basis of  
936 phenotypic convergence. Annu. Rev. Ecol. Syst. 45: 203–226. doi:10.1146/annurev-  
937 ecolsys-120213-091851
- 938 Schluter, D., and G.L. Conte. 2009. Genetics and ecological speciation. Proc. Natl. Acad.  
939 Sci. USA, 106: 9955–9962. <https://doi.org/10.1073/pnas.0901264106>
- 940 Schluter, D., Marchinko, K. B., Barrett, R. D., and S. M. Rogers. 2010. Natural selection  
941 and the genetics of adaptation in threespine stickleback. Phil. Trans. R. Soc. Lond. B  
942 Biol Sci. 365(1552): 2479–2486. doi:10.1098/rstb.2010.0036
- 943 Shapiro, M. D., Bell, M. A., and D.M. Kingsley. 2006. Parallel genetic origins of pelvic  
944 reduction in vertebrates. Proc. Natl. Acad. Sci USA 103: 13753–13758.  
945 <https://doi.org/10.1073/pnas.0604706103>
- 946 Shapiro, M. D, Marks, M. E., Peichel, C. L., Blackman, B. K., Nereng, K. S., Jo, B., ...  
947 and D. M. Kingsley. 2004. Genetic and developmental basis of evolutionary pelvic  
948 reduction in threespine sticklebacks. Nature 428: 717–724.

- 949 Shapiro, Michael D, Summers, B. R., Balabhadra, S., Aldenhoven, J. T., Miller, A. L.,  
950 Cunningham, C. B., ... and D.M. Kingsley. 2009. The genetic architecture of  
951 skeletal convergence and sex determination in ninespine sticklebacks. *Curr. Biol.* 19:  
952 1140–1145. <https://doi.org/10.1016/j.cub.2009.05.029>.The
- 953 Shikano, T., Laine, V. N., Herczeg, G., Vilkki, J., and J. Merilä. 2013. Genetic  
954 architecture of parallel pelvic reduction in ninespine sticklebacks. *3G: Genes,  
955 Genomes, Genetics*, 3: 1833–1842. <https://doi.org/10.1534/g3.113.007237>
- 956 Shikano, T., Shimada, Y., Herczeg, G., and J. Merilä. 2010a. History vs. habitat type:  
957 Explaining the genetic structure of European nine-spined stickleback (*Pungitius  
958 pungitius*) populations. *Mol. Ecol.* 19: 1147–1161. [https://doi.org/10.1111/j.1365-  
959 294X.2010.04553.x](https://doi.org/10.1111/j.1365-294X.2010.04553.x)
- 960 Shikano, T., Ramadevi, J., & Merilä, J. 2010b. Identification of local-and habitat-  
961 dependent selection: scanning functionally important genes in nine-spined  
962 sticklebacks (*Pungitius pungitius*). *Mol. Biol. Evol.* 27: 2775–2789.
- 963 Sillanpää, M. J. 2011. On statistical methods for estimating heritability in wild  
964 populations. *Mol. Ecol.* 20: 1324–1332. [https://doi.org/10.1111/j.1365-  
965 294X.2011.05021.x](https://doi.org/10.1111/j.1365-294X.2011.05021.x)
- 966 Stern, D. L. 2013. The genetic causes of convergent evolution. *Genetics* 14: 751–764.  
967 <https://doi.org/10.1038/nrg3483>
- 968 Stuart, Y. E., Veen, T., Weber, J. N., Hanson, D., Ravinet, M., Lohman, B. K., ... and  
969 D.I. Bolnick. 2017. Contrasting effects of environment and genetics generate a  
970 continuum of parallel evolution. *Nature Ecol. Evol.* 1: 0158.  
971 <https://doi.org/10.1038/s41559-017-0158>
- 972 Taggart, J. B., Hynes, R. A., and A. Ferguson. 1992. A simplified protocol for routine  
973 total DNA isolation from salmonid fishes. *J. Fish. Biol* 40: 963–965.
- 974 Tanaka, M., Hale, L. A., Amores, A., Yan, Y., Cresko, W. A., Suzuki, T., and J. H.  
975 Postlethwait. 2005. Developmental genetic basis for the evolution of pelvic fin loss  
976 in the pufferfish *Takifugu rubripes*. *Dev. Biol.* 281: 227–239.  
977 <https://doi.org/10.1016/j.ydbio.2005.02.016>
- 978 Terekhanova, N. V, Barmintseva, A. E., Kondrashov, A. S., Bazykin, G. A., and N. S.  
979 Mugue. 2019. Architecture of parallel adaptation in ten lacustrine threespine  
980 stickleback populations from the White Sea area. *Genome Biol. Evol.* 11: 2605–  
981 2618. <https://doi.org/10.1093/gbe/evz175>

- 982 Terekhanova, N. V, Logacheva, M. D., Penin, A. A., Neretina, T. V, Barmintseva, A. E.,  
983 Bazykin, G. A., ... N.S. Mague. 2014. Fast evolution from precast bricks :  
984 Genomics of young freshwater populations of threespine stickleback *Gasterosteus*  
985 *aculeatus*. PLoS Genet. 10: e1004696. <https://doi.org/10.1371/journal.pgen.1004696>
- 986 Thompson, K. A., Osmond, M. M., and D. Schluter. 2019. Parallel genetic evolution and  
987 speciation from standing variation. *Evol. Lett.* 3:129–141.  
988 <https://doi.org/10.1002/evl3.106>
- 989 Thompson, K. A., Rieseberg, L. H., and D. Schluter. 2018. Speciation and the city.  
990 *Trends Ecol. Evol* 33: 815–826.
- 991 Tibshirani, R. 1996. Regression shrinkage and selection via the Lasso. *J. R. Stat. Soc.*  
992 *Series. B* 58: 267–288.
- 993 Varadharajan, S., Rastas, P., Löytynoja, A., Matschiner, M., Calboli, F. C. F., Guo, B., ...  
994 and J. Merilä. 2019. A high-quality assembly of the nine-spined stickleback  
995 (*Pungitius pungitius*) genome. *Genome Biol. Evol.* 11: 3291–3308. evz240,  
996 <https://doi.org/10.1093/gbe/evz240>
- 997 Van Ooijen, J. W. 2009. MapQTL v. 6.0: Software for the mapping of quantitative trait  
998 loci in experimental populations of diploid species. Kyazma BV, Wageningen, The  
999 Netherlands.
- 1000 Wang, Y., Zhao, Y., Wang, Y., Li, Z., Guo, B., and J. Merilä. 2020. Population  
1001 transcriptomics reveals weak parallel genetic basis in repeated marine and  
1002 freshwater divergence in nine-spined sticklebacks. *Mol. Ecol.*  
1003 <https://doi.org/10.1111/mec.15435>
- 1004 Wolf, J. B., Brodie, E. D., and M. J. Wade. 2000. *Epistasis and the Evolutionary Process.*  
1005 Oxford University Press, Oxford.
- 1006 Xie, K. T., Wang, G., Thompson, A. C., Wucherpfennig, J. I., Reimchen, T. E., Maccoll,  
1007 A. D. C., ... and P. Lake. 2019. DNA fragility in the parallel evolution of pelvic  
1008 reduction in stickleback fish. *Science* 84: 81–84.
- 1009 Xu, S. 1996. Mapping quantitative trait loci using four-way crosses. *Genet. Res.* 68: 175–  
1010 181.
- 1011 Xu, S. 2013a. Genetic mapping and genomic selection using recombination breakpoint  
1012 data. *Genetics* 195: 1103–1115. <https://doi.org/10.1534/genetics.113.155309>

- 1013 Xu, S. 2013b. Principles of Statistical Genomics. Springer, New York.  
1014 [https://doi.org/DOI 10.1007/978-0-387-70807-2](https://doi.org/DOI%2010.1007/978-0-387-70807-2)
- 1015 Yang, J., Guo, B., Shikano, T., Liu, X., and J. Merilä. 2016. Quantitative trait locus  
1016 analysis of body shape divergence in nine-spined sticklebacks based on high-density  
1017 SNP-panel. Sci. Rep. 6: 26632. <https://doi.org/10.1038/srep26632>
- 1018  
1019 **Data Accessibility Statement**  
1020 All data and codes used in analyses can be found in Dryad (DOI  
1021 <https://doi.org/10.5061/dryad.76hdr7str>).

1022 **Table 1 | Summary of QTL-mapping analyses.** Each row corresponds to a significant  
 1023 (arbitrarily numbered) QTL region, with the proportion variance explained (PVE), jointly  
 1024 estimated for all PCs (one for each significant LD-cluster) extracted from such regions.  
 1025 Coding indicates whether the QTL was significant for the alleles inherited from the F<sub>1</sub>  
 1026 female (♀), the F<sub>1</sub> male (♂) or the dominance effect (dom). Effect size ( $\beta$ ) is based on the  
 1027 first PC extracted from all SNPs from each significant QTL region. “Std.” indicates  
 1028 whether the trait was standardised (Yes) or not (No).  $P$  and  $P_{COR}$  represent nominal and  
 1029 corrected  $P$ -values from single-mapping four-way analyses, respectively. Results for  
 1030 standardised trait values are only shown for QTL that were not also significant for  
 1031 absolute trait values.

| Cross     | Trait  | Coding | LG | QTL | Std. | $P$      | $P_{COR}$ | $PVE_{TOT}$ | $\beta$ |
|-----------|--------|--------|----|-----|------|----------|-----------|-------------|---------|
| HEL x RYT | Spine  | male   | 7  | 1   | No   | 1.31e-04 | 0.019     | 0.285       | 1.654   |
| HEL x RYT | Spine  | female | 7  | 1   | No   | 1.26e-04 | 0.026     | 0.311       | 1.573   |
| HEL x RYT | Girdle | male   | 7  | 1   | No   | 3.66e-04 | 0.04      | 0.311       | 2.041   |
| HEL x RYT | Girdle | female | 7  | 1   | No   | 1.08e-04 | 0.024     | 0.263       | 1.711   |
| HEL x RYT | Spine  | dom    | 7  | 1   | No   | 1.08e-07 | <0.001    | 0.213       | 1.432   |
| HEL x RYT | Girdle | dom    | 7  | 1   | No   | 1.35e-04 | 0.028     | 0.154       | 1.463   |
| HEL x BYN | Spine  | male   | 15 | 2   | No   | 6.12e-06 | 0.001     | 0.095       | 0.54    |
| HEL x BYN | Spine  | male   | 16 | 3   | No   | 1.16e-04 | 0.01      | 0.086       | 0.493   |
| HEL x BYN | Spine  | male   | 21 | 4   | No   | 3.36e-04 | 0.031     | 0.037       | 0.36    |
| HEL x BYN | Spine  | female | 6  | 5   | No   | 1.37e-04 | 0.018     | 0.07        | 0.5     |
| HEL x BYN | Girdle | male   | 14 | 6   | No   | 2.49e-04 | 0.024     | 0.039       | 0.307   |
| HEL x PYÖ | Spine  | male   | 9  | 7   | No   | 8.96e-11 | <0.001    | 0.108       | 0.352   |
| HEL x PYÖ | Girdle | male   | 19 | 8   | No   | 1.56e-05 | 0.001     | 0.056       | 0.325   |
| HEL x PYÖ | Girdle | female | 4  | 9   | No   | 1.32e-04 | 0.02      | 0.045       | 0.301   |
| HEL x BYN | Spine  | female | 16 | 10  | Yes  | 2.53e-04 | 0.03      | 0.047       | 0.007   |
| HEL x BYN | Girdle | female | 1  | 11  | Yes  | 2.13e-05 | 0.002     | 0.077       | 0.006   |
| HEL x BYN | Girdle | male   | 1  | 11  | Yes  | 1.41e-04 | 0.016     | 0.026       | 0.005   |
| HEL x PYÖ | Spine  | male   | 1  | 13  | Yes  | 4.75e-06 | <0.001    | 0.075       | 0.005   |
| HEL x PYÖ | Girdle | male   | 1  | 13  | Yes  | 9.69e-05 | 0.016     | 0.044       | 0.005   |

1032

1033 **Table 2 | Proportion phenotypic variance explained (PVE) in pelvic traits.**  
 1034 Percentages of total phenotypic variance explained by different linkage groups (LG), by  
 1035 all SNPs (Tot), by loci inherited from females (♀) and males (♂), as well as the  
 1036 dominance effect (Dom). Results are shown for each cross and trait separately, and for  
 1037 absolute trait values.

| LG         | HEL x RYT |        | HEL x BYN |        | HEL x PYÖ |        |
|------------|-----------|--------|-----------|--------|-----------|--------|
|            | Spine     | Girdle | Spine     | Girdle | Spine     | Girdle |
| 1          | -         | 0.01   | 0.03      | 0.05   | -         | -      |
| 2          | -         | -      | 0.01      | 0.03   | -         | 0.02   |
| 3          | -         | -      | -         | 0.01   | -         | -      |
| 4          | -         | 0.02   | 0.01      | 0.01   | -         | 0.03   |
| 5          | -         | -      | -         | -      | -         | -      |
| 6          | -         | -      | 0.03      | -      | 0.02      | -      |
| 7          | 0.85      | 0.82   | 0.02      | 0.02   | -         | -      |
| 8          | -         | -      | 0.01      | 0.01   | -         | -      |
| 9          | -         | -      | -         | 0.02   | 0.11      | -      |
| 10         | -         | -      | -         | 0.06   | -         | -      |
| 11         | -         | -      | 0.02      | -      | -         | -      |
| 12         | 0.02      | 0.02   | 0.03      | 0.01   | 0.01      | -      |
| 13         | -         | -      | -         | 0.01   | -         | 0.02   |
| 14         | -         | -      | -         | 0.05   | 0.01      | 0.02   |
| 15         | -         | -      | 0.09      | 0.01   | -         | -      |
| 16         | -         | -      | 0.12      | 0.01   | -         | -      |
| 17         | -         | -      | 0.01      | 0.01   | -         | -      |
| 18         | -         | -      | -         | 0.04   | -         | 0.01   |
| 19         | -         | -      | 0.02      | 0.06   | -         | 0.05   |
| 20         | -         | -      | -         | 0.01   | -         | -      |
| 21         | -         | -      | 0.03      | -      | 0.01      | -      |
| <b>Tot</b> | 0.8       | 0.76   | 0.39      | 0.32   | 0.14      | 0.16   |
| ♂          | 0.3       | 0.38   | 0.24      | 0.16   | 0.14      | 0.08   |
| ♀          | 0.29      | 0.27   | 0.17      | 0.06   | -         | 0.09   |
| <b>Dom</b> | 0.23      | 0.17   | 0.01      | 0.13   | 0.01      | -      |

1038

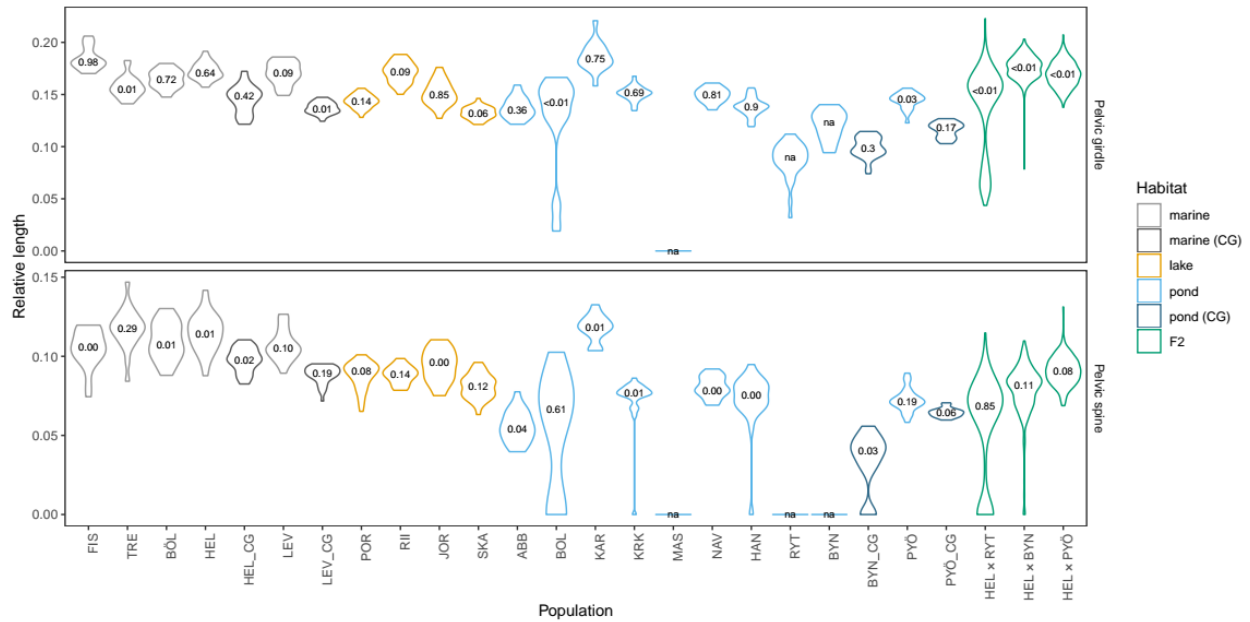

1039 **Figure 1 | Summary of previously published nine-spined stickleback pelvic**  
 1040 **phenotypes from the wild and common garden experiments.** Violin plots depict  
 1041 relative (to standard body length) pelvic spine and girdle lengths according to population  
 1042 and habitat type. Numbers in the top panel show  $P$ -values for Pearson's product moment  
 1043 correlation between relative pelvic spine and relative pelvic girdle lengths, and numbers  
 1044 in the bottom panel show the respective squared correlation coefficients for each  
 1045 population/cross. "na" indicates data with no variation in spine or girdle lengths. Further  
 1046 details can be found in Supplementary Fig. 2 and Supplementary Table 1. Phenotypic  
 1047 data for  $F_2$  individuals from the current study are also presented (HEL  $\times$  RYT, HEL  $\times$   
 1048 BYN, and HEL  $\times$  PYÖ) for comparison. Details of sample locations and data collection  
 1049 can be found from Herczeg *et al.* (2010) and Karhunen *et al.* (2013). Data from common  
 1050 garden experiments is indicated by the suffix "\_CG" in the x-axis labels.

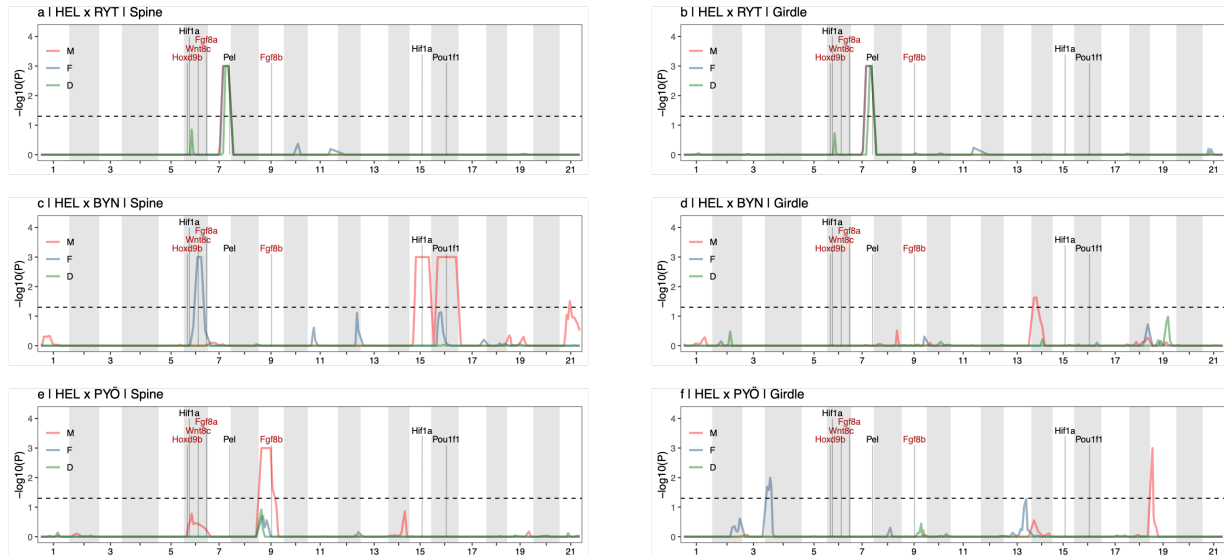

1051 **Figure 2 | Quantitative trait locus mapping of pelvic reduction in three independent**  
1052 **stickleback crosses.** Single-mapping four-way analyses of four morphological traits  
1053 associated with pelvic reduction in (a-b) HEL × RYT cross, (c-d) HEL × BYN cross, and  
1054 (e-f) HEL × PYÖ cross. QTL for pelvic spine length and girdle length are shown, with  
1055 the x-axis indicating position in centi Morgans (cM). Results are based on permutations,  
1056 and the dotted vertical line indicates genome wide significance at  $\alpha = 0.05$ . Results are  
1057 shown separately for alleles inherited from the male F<sub>1</sub> (M), the female F<sub>1</sub> (F), together  
1058 with the dominance effect (D) according to the legend. Absence of a dominance effect  
1059 indicates that the trait inheritance is additive, whereas a peak only for M or F indicates  
1060 that the allelic effect was segregating in the F<sub>0</sub> male or the F<sub>0</sub> female, respectively (see  
1061 Supplementary File 1 for details). Candidate genes involved in pelvic development are  
1062 indicated with black text representing genes that affect expression of *Pitx1*, and red text  
1063 indicates genes that affect pelvic development downstream of *Pitx1* expression. Results  
1064 for analyses based on relative trait values can be found in Supplementary Figure 5.



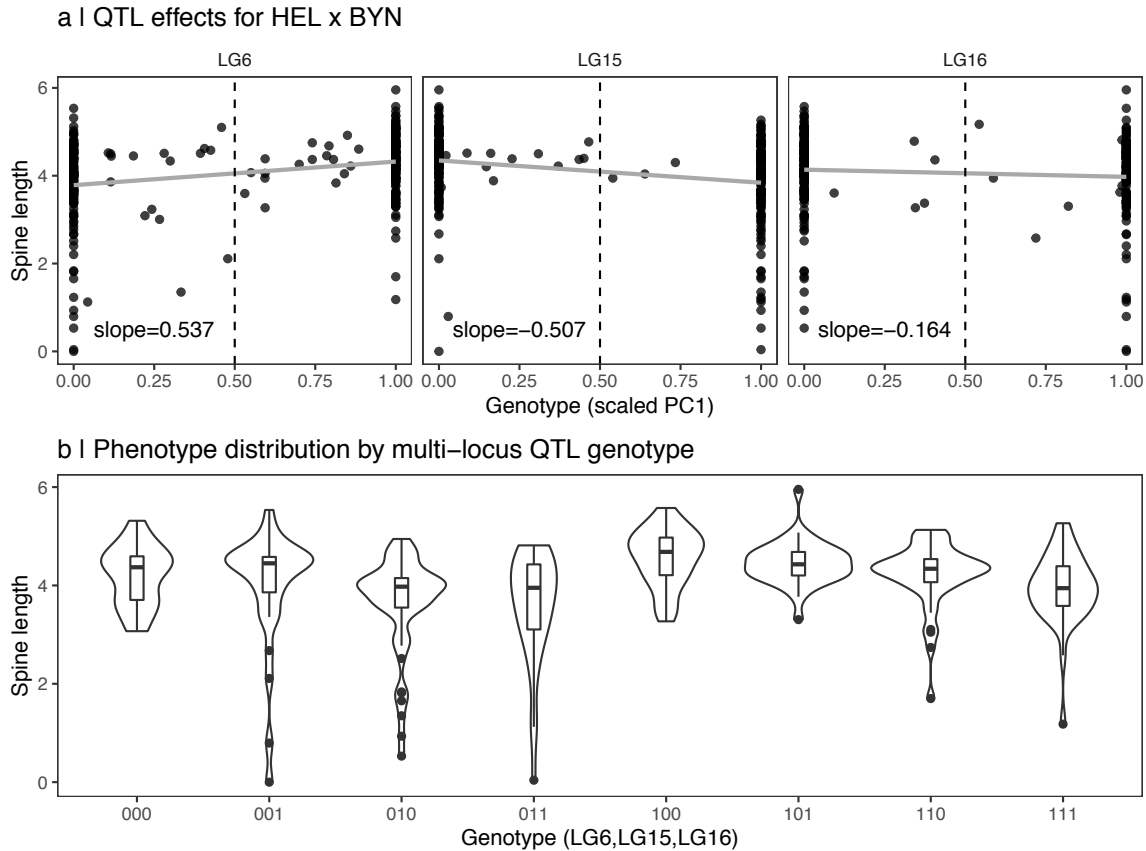

1065

1066

**Figure 3 | Epistatic interactions in pelvic spine development for HEL × BYN cross.**

1067

(a) The effects of individual genotype, where the genotype is given by the first PC (scaled

1068

on LG6, LG15 and LG16 (see Fig. 2), respectively. Genotypes were further based on the

1069

genotypes  $[x_{dij}, x_{sij}]$  depending on which of these were significant for the QTL effects ( $x_{dij}$

1070

for LG6 and  $x_{sij}$  for LG15 and LG16). Some individuals have genotypes between 0 and 1

1071

only because the genotype is based on the first PC of large sets of highly but not perfectly

1072

correlated SNPs. Slope of the regression line (grey) is shown. (b) distribution of spine

1073

lengths for all multi-locus genotypes from (a). The multi-locus genotype was based on

1074

rounding PC1 coordinates from (a) where values below 0.5 (left of vertical dashed line)

1075

were considered as “Allele 0”, and those above or equal to 0.5 were considered as “Allele

1076

1”. The first digit for genotypes in (b) thus represents the genotype of the QTL on LG6,

1077

followed by LG15 and LG16, respectively.

1078

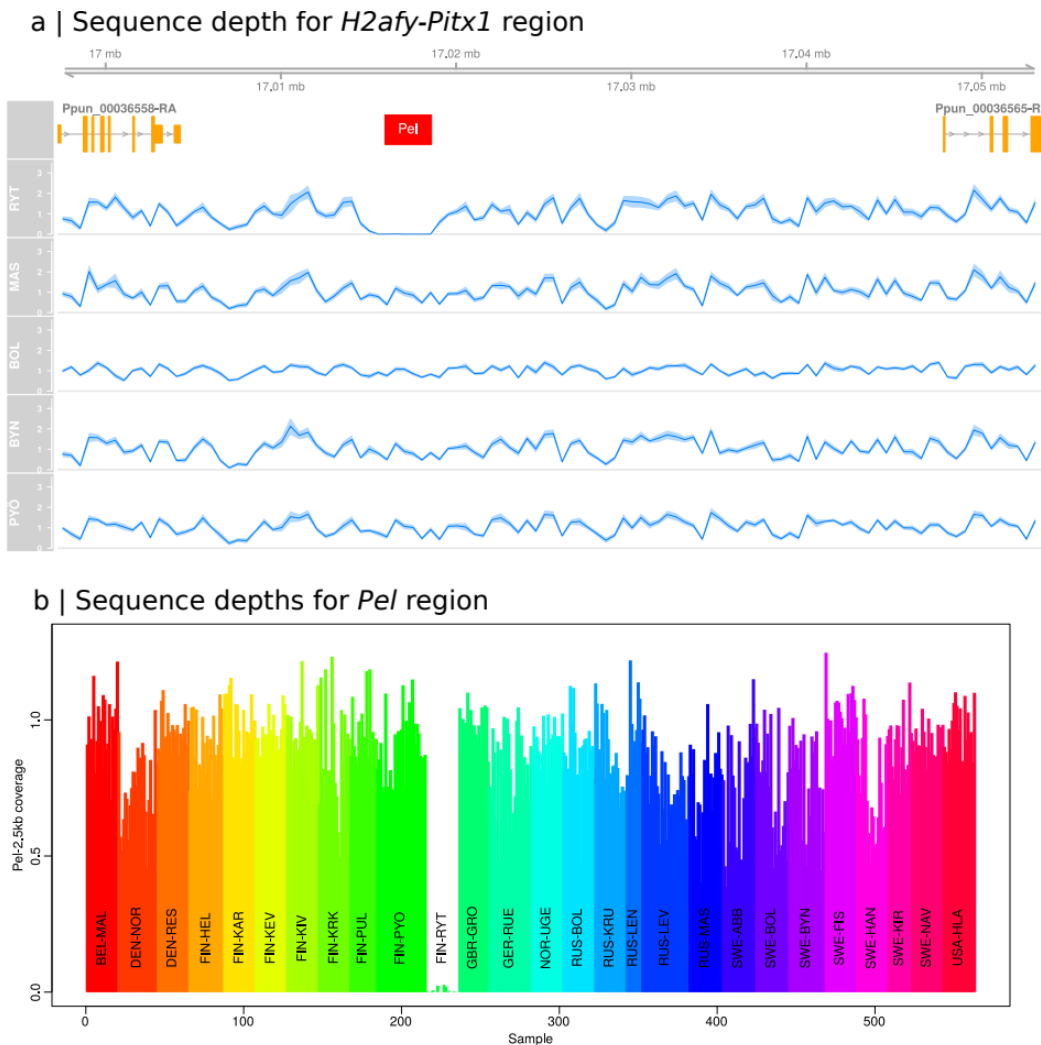

1079 **Figure 4 | Sequence depths for *H2afy-Pitx1* region.** (a) Relative sequencing depth  
1080 across the *H2afy-Pitx1* intergenic region for 10 individuals from five different  
1081 populations. Blue line and shading indicate population average and 95% confidence  
1082 intervals, respectively. The 3.5kb deletion in RYT, seen as a dip in sequencing depth,  
1083 fully encloses the *Pel*-2.5kb<sup>SALR</sup> of three-spined stickleback indicated by the red box. (b)  
1084 Normalised sequencing depths for the *Pel*-2.5kb<sup>SALR</sup> region for 563 samples from 27  
1085 populations, showing that the complete deletion of the *Pel* region is unique to RYT.  
1086 Phenotypic data in the Russian populations MAS and BOL suggest that a large effect  
1087 locus is responsible for pelvic reductions, and BYN and PYÖ (analysed here) are  
1088 populations in which pelvic reduction does not map to LG7.

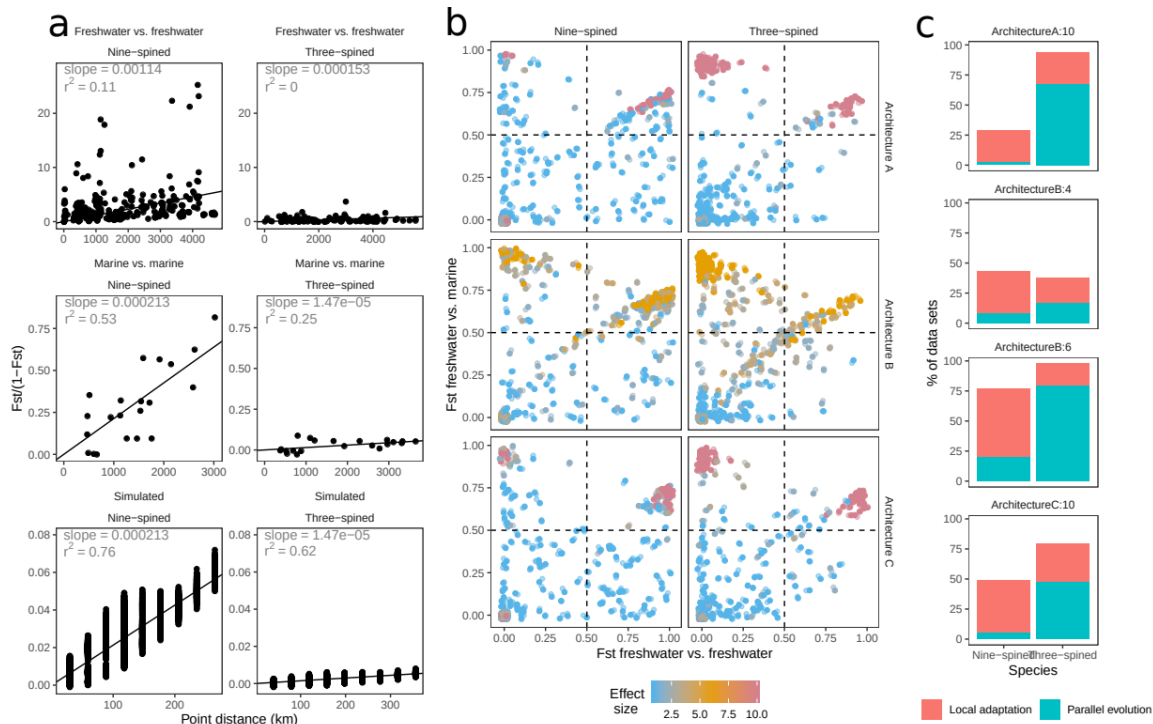

1089 **Figure 5 | Simulation results.** Linearised  $F_{ST}$  against geographic distance (IBD) for  
 1090 empirical and simulated data (a), with slope and squared Pearson's product moment  
 1091 correlation coefficient indicated. Geographic distance for simulated data (IBD in the sea)  
 1092 is scaled to match the slope for the IBD-plot in the sea in the empirical data. Freshwater-  
 1093 freshwater  $F_{ST}$  against marine-freshwater  $F_{ST}$  from all QTL from all simulated data ( $n =$   
 1094 100), with effect sizes indicated as shown in legend (b). Loci in the upper left quadrant  
 1095 are classified as being involved in parallel evolution, and loci in the upper right quadrant  
 1096 are loci that are involved in local adaptation in only one freshwater population. This data  
 1097 is summarised in (c) focusing on the four largest effect loci, with genetic architecture and  
 1098 effect sizes indicated by the figure titles.
